# Supplementary material for: A multi-parent recombinant inbred line population of C. elegans allows identification of novel QTLs for complex life history traits
Source: PubMed Central journal article supplement (PMC6417139; doi:10.1186/s12915-019-0642-8), 2019-03-12

# Heatshock

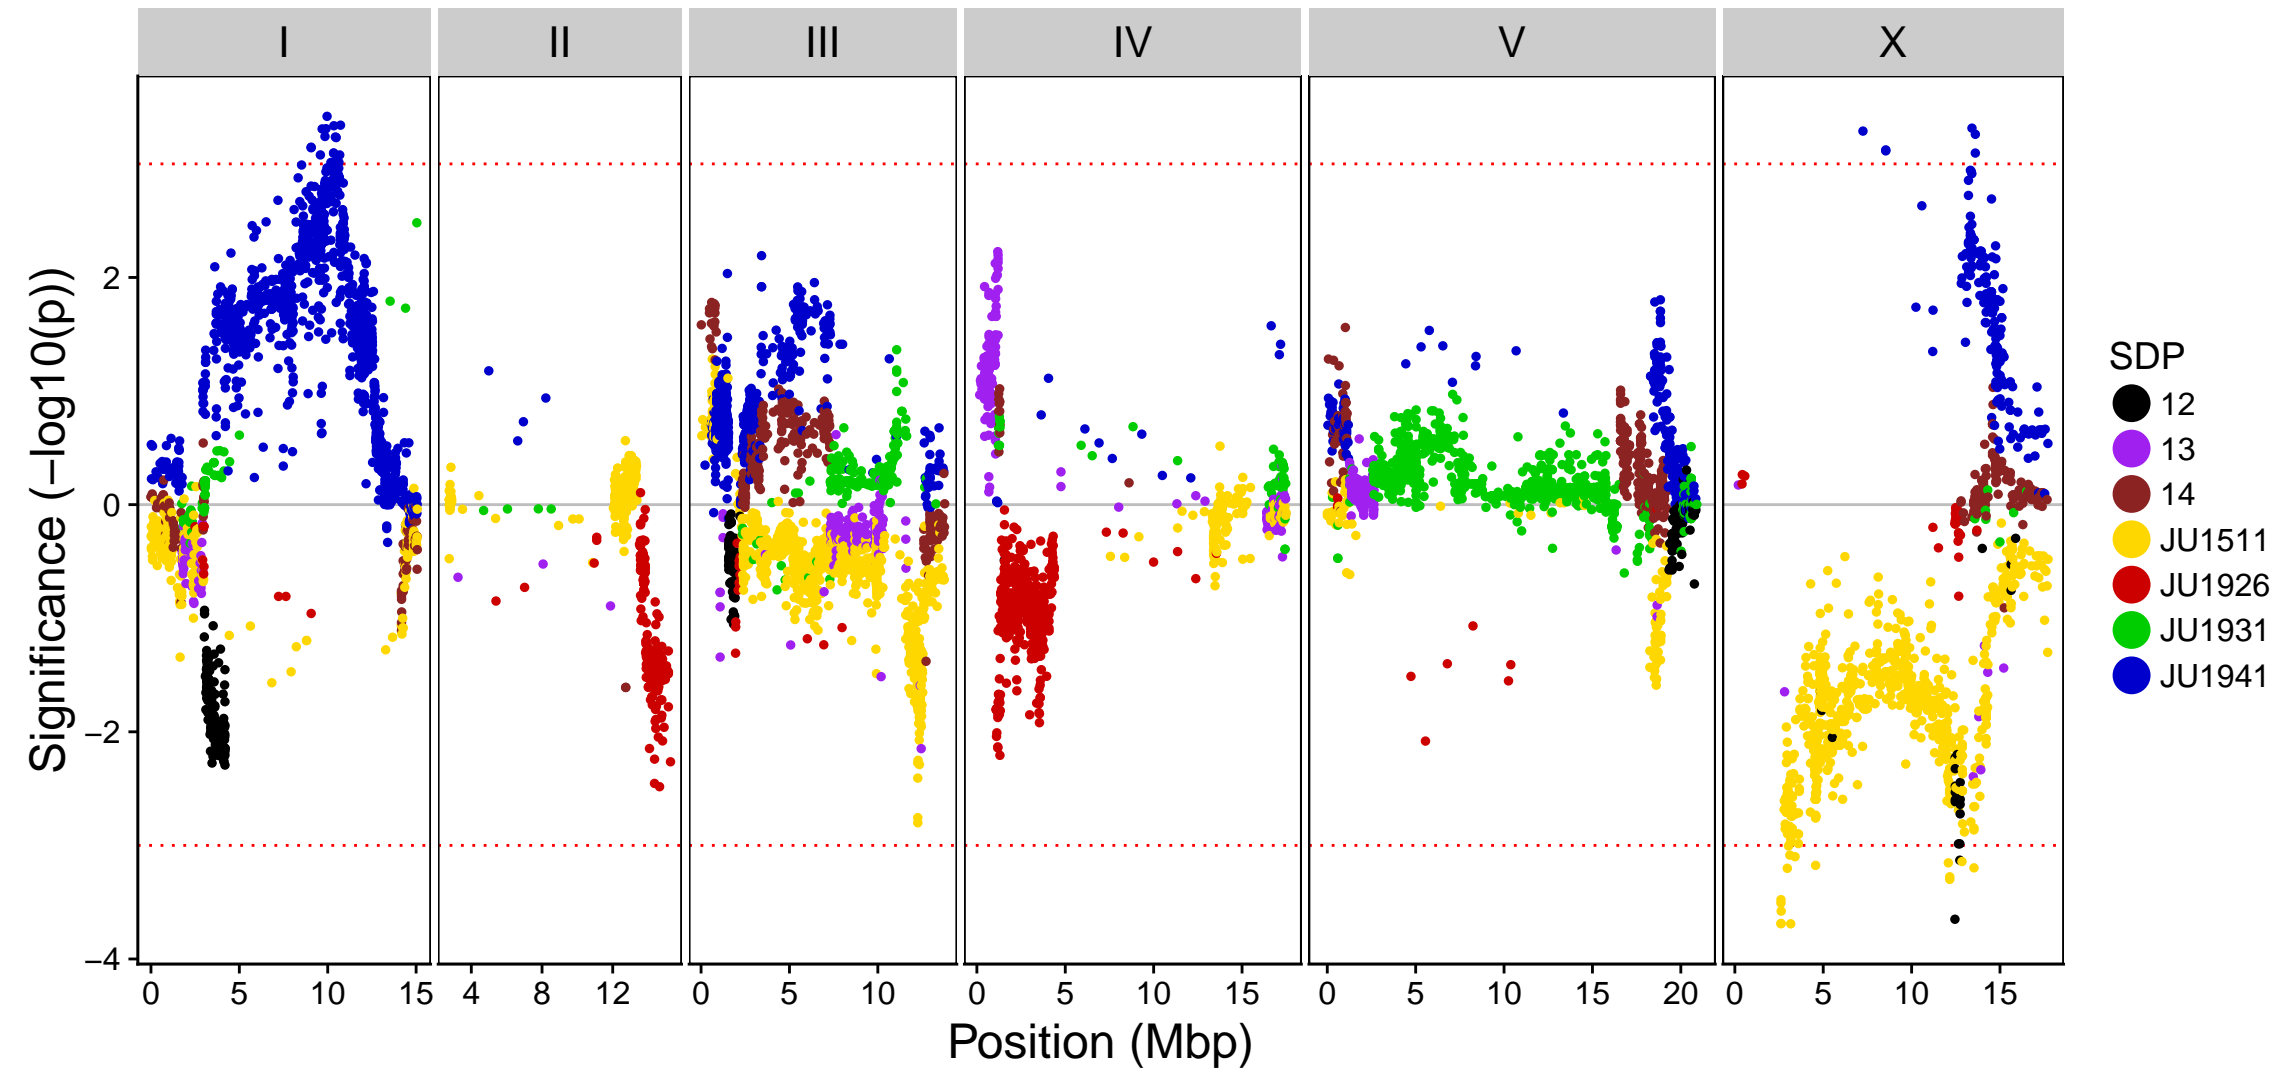

# Oxistress

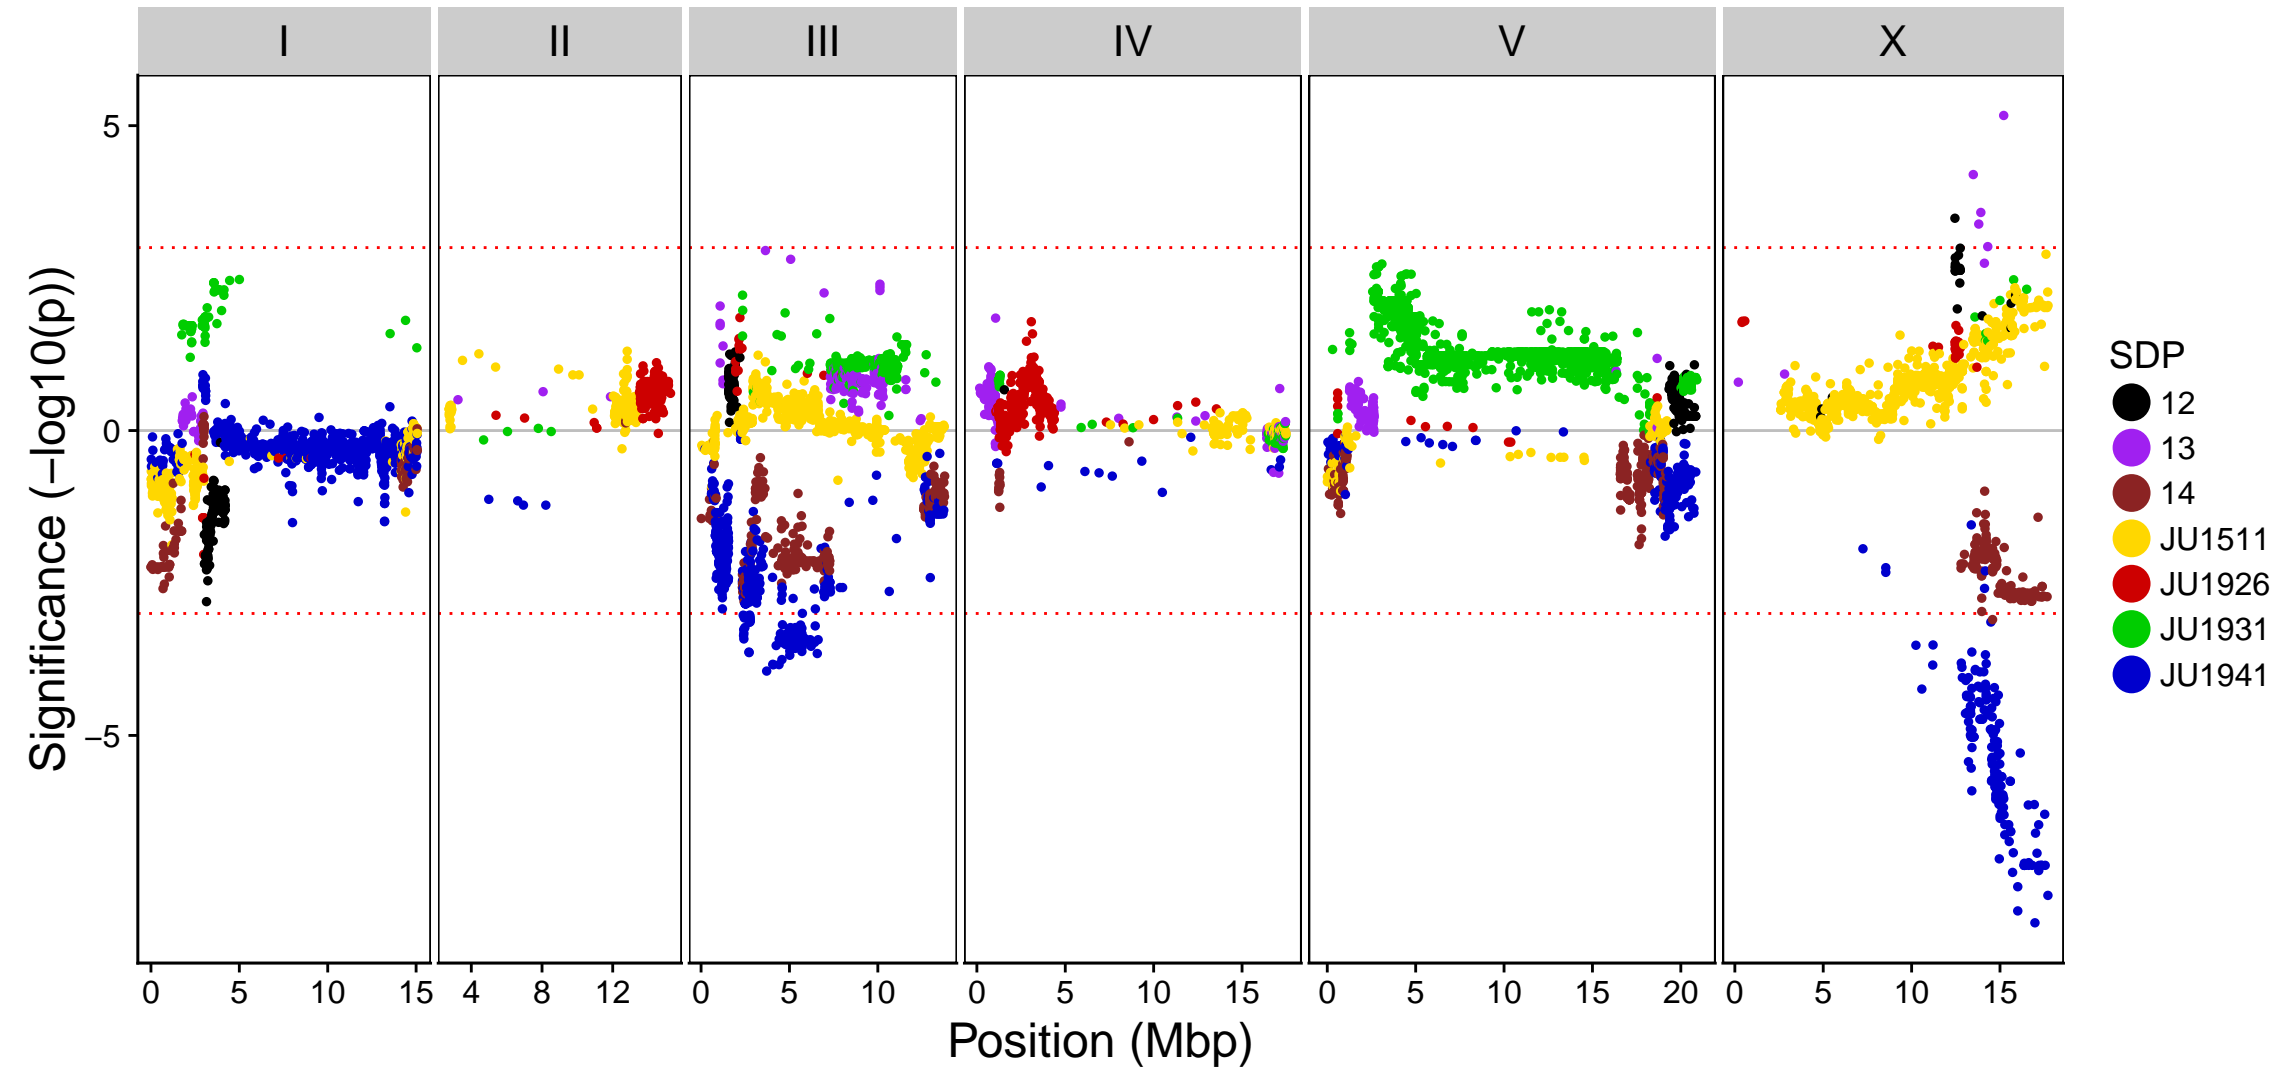

# Lifespan

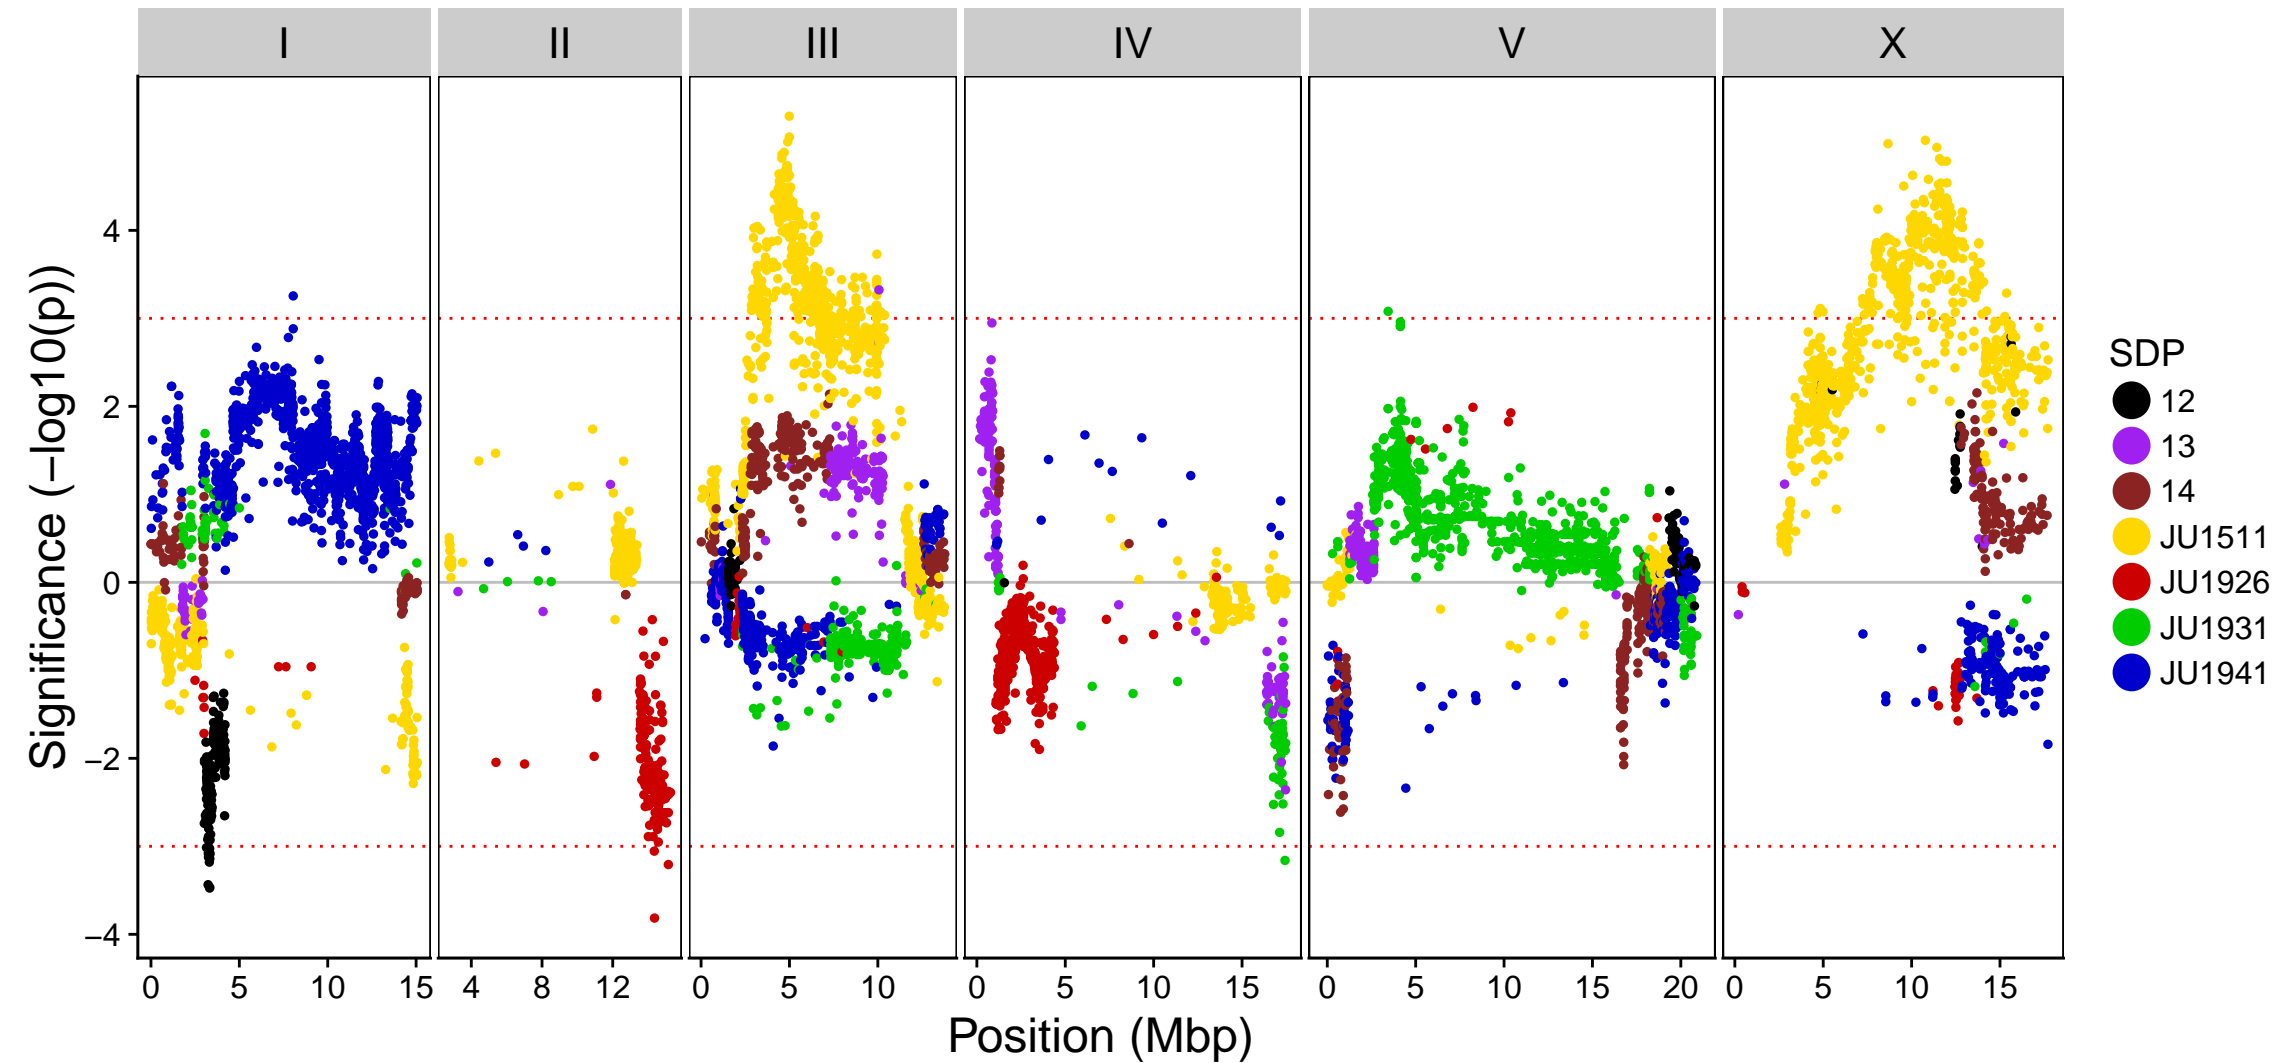

# Lifespan (DR)

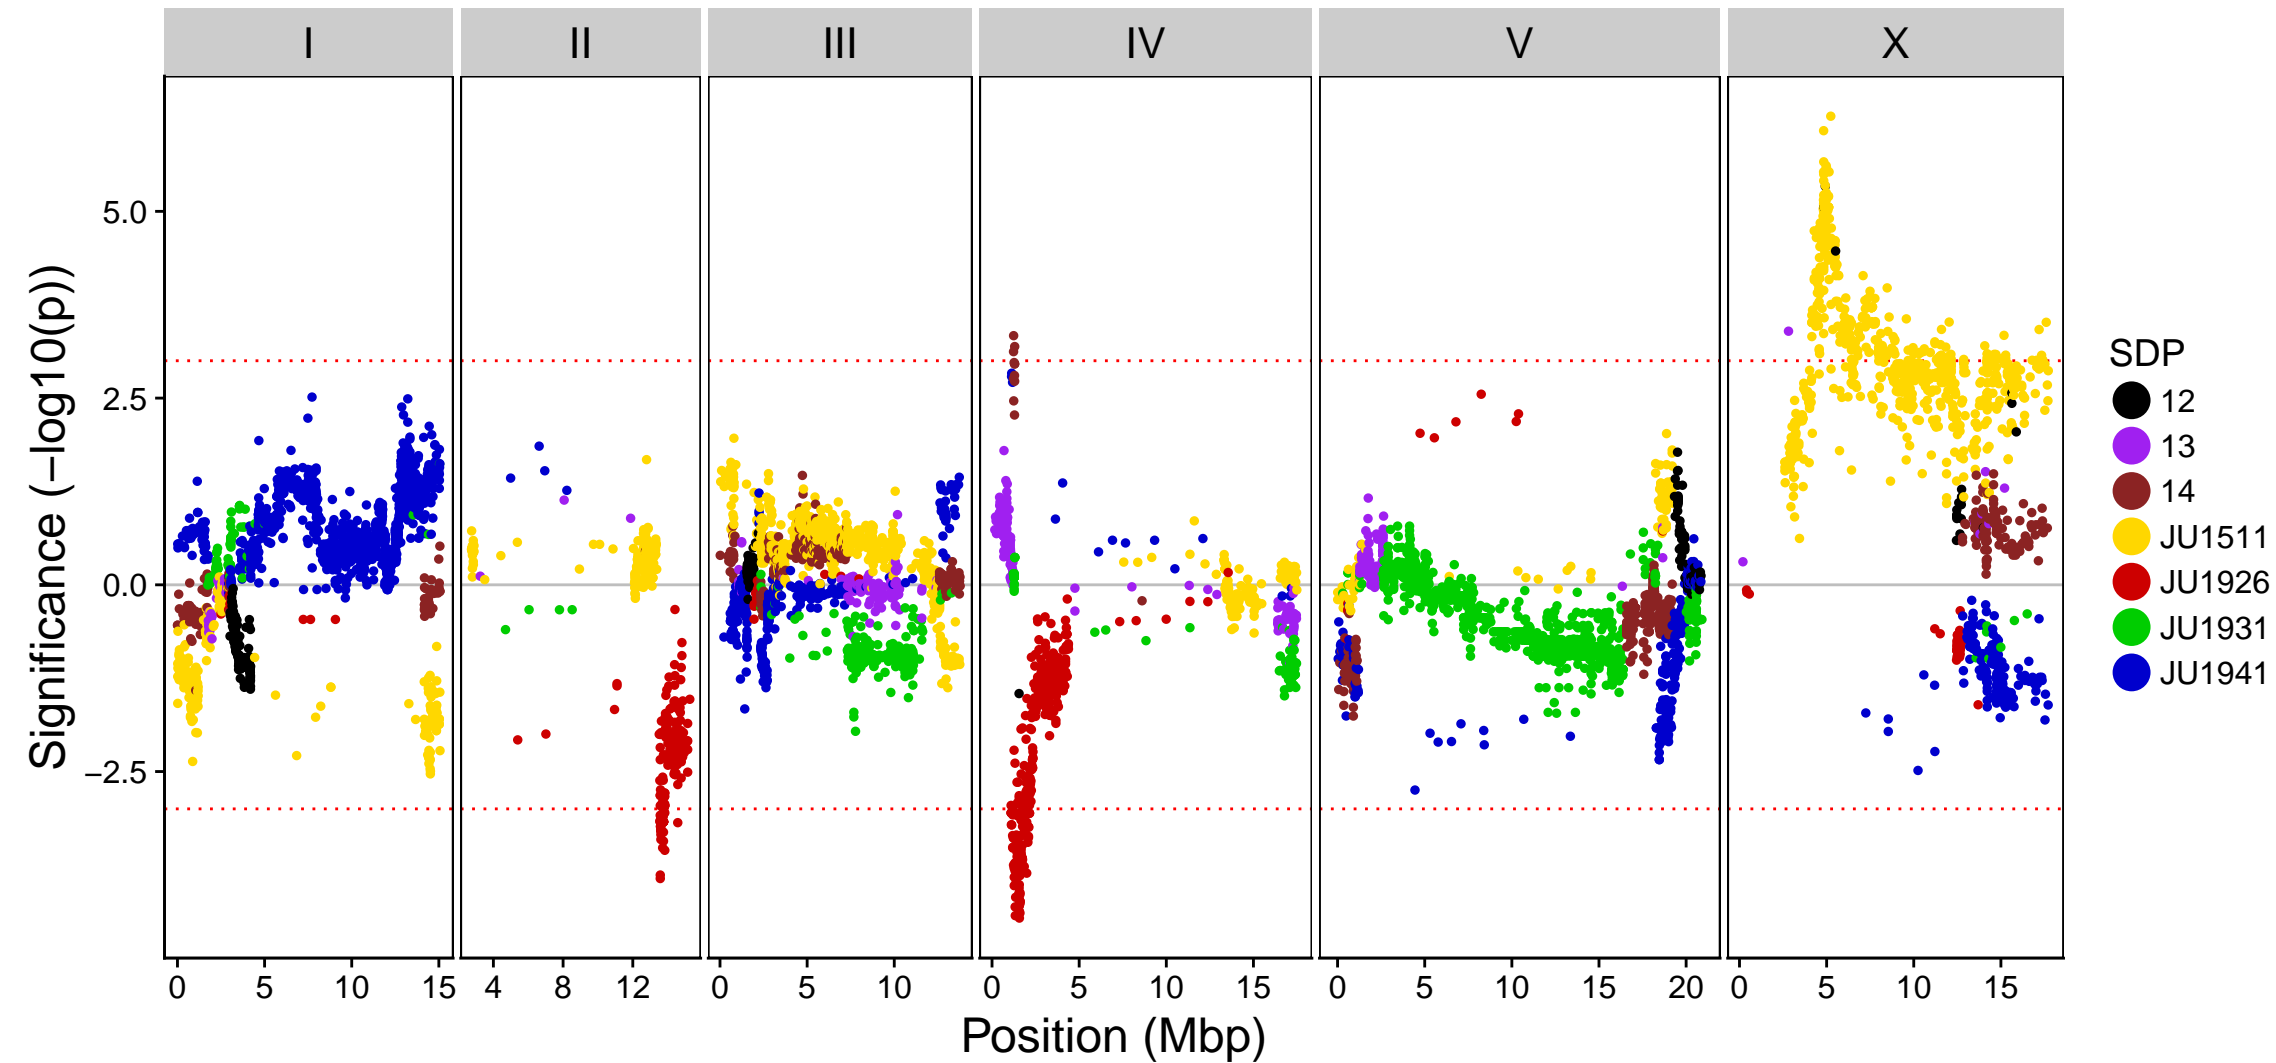

# DR effect

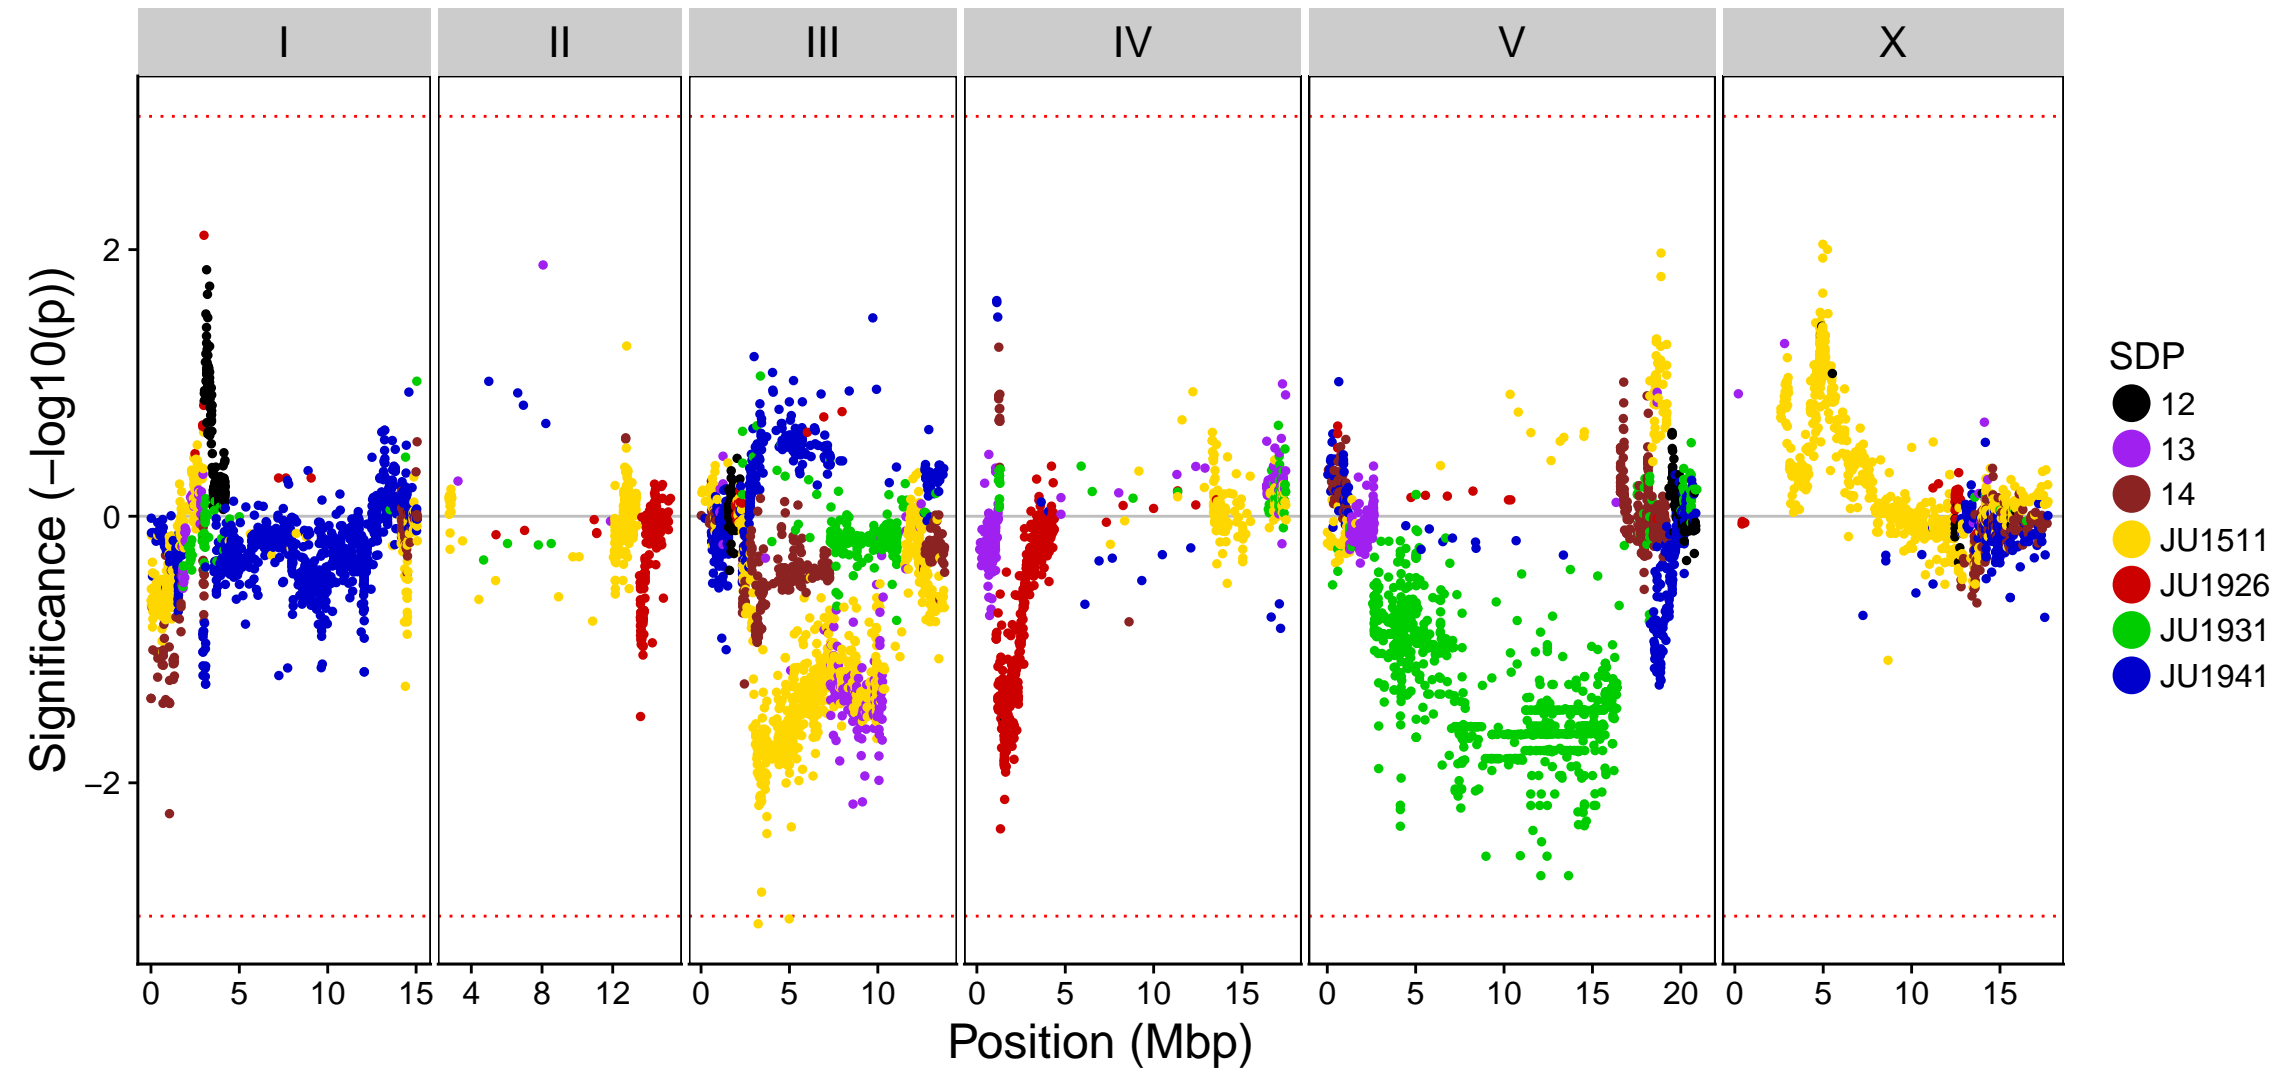

# Males OP50

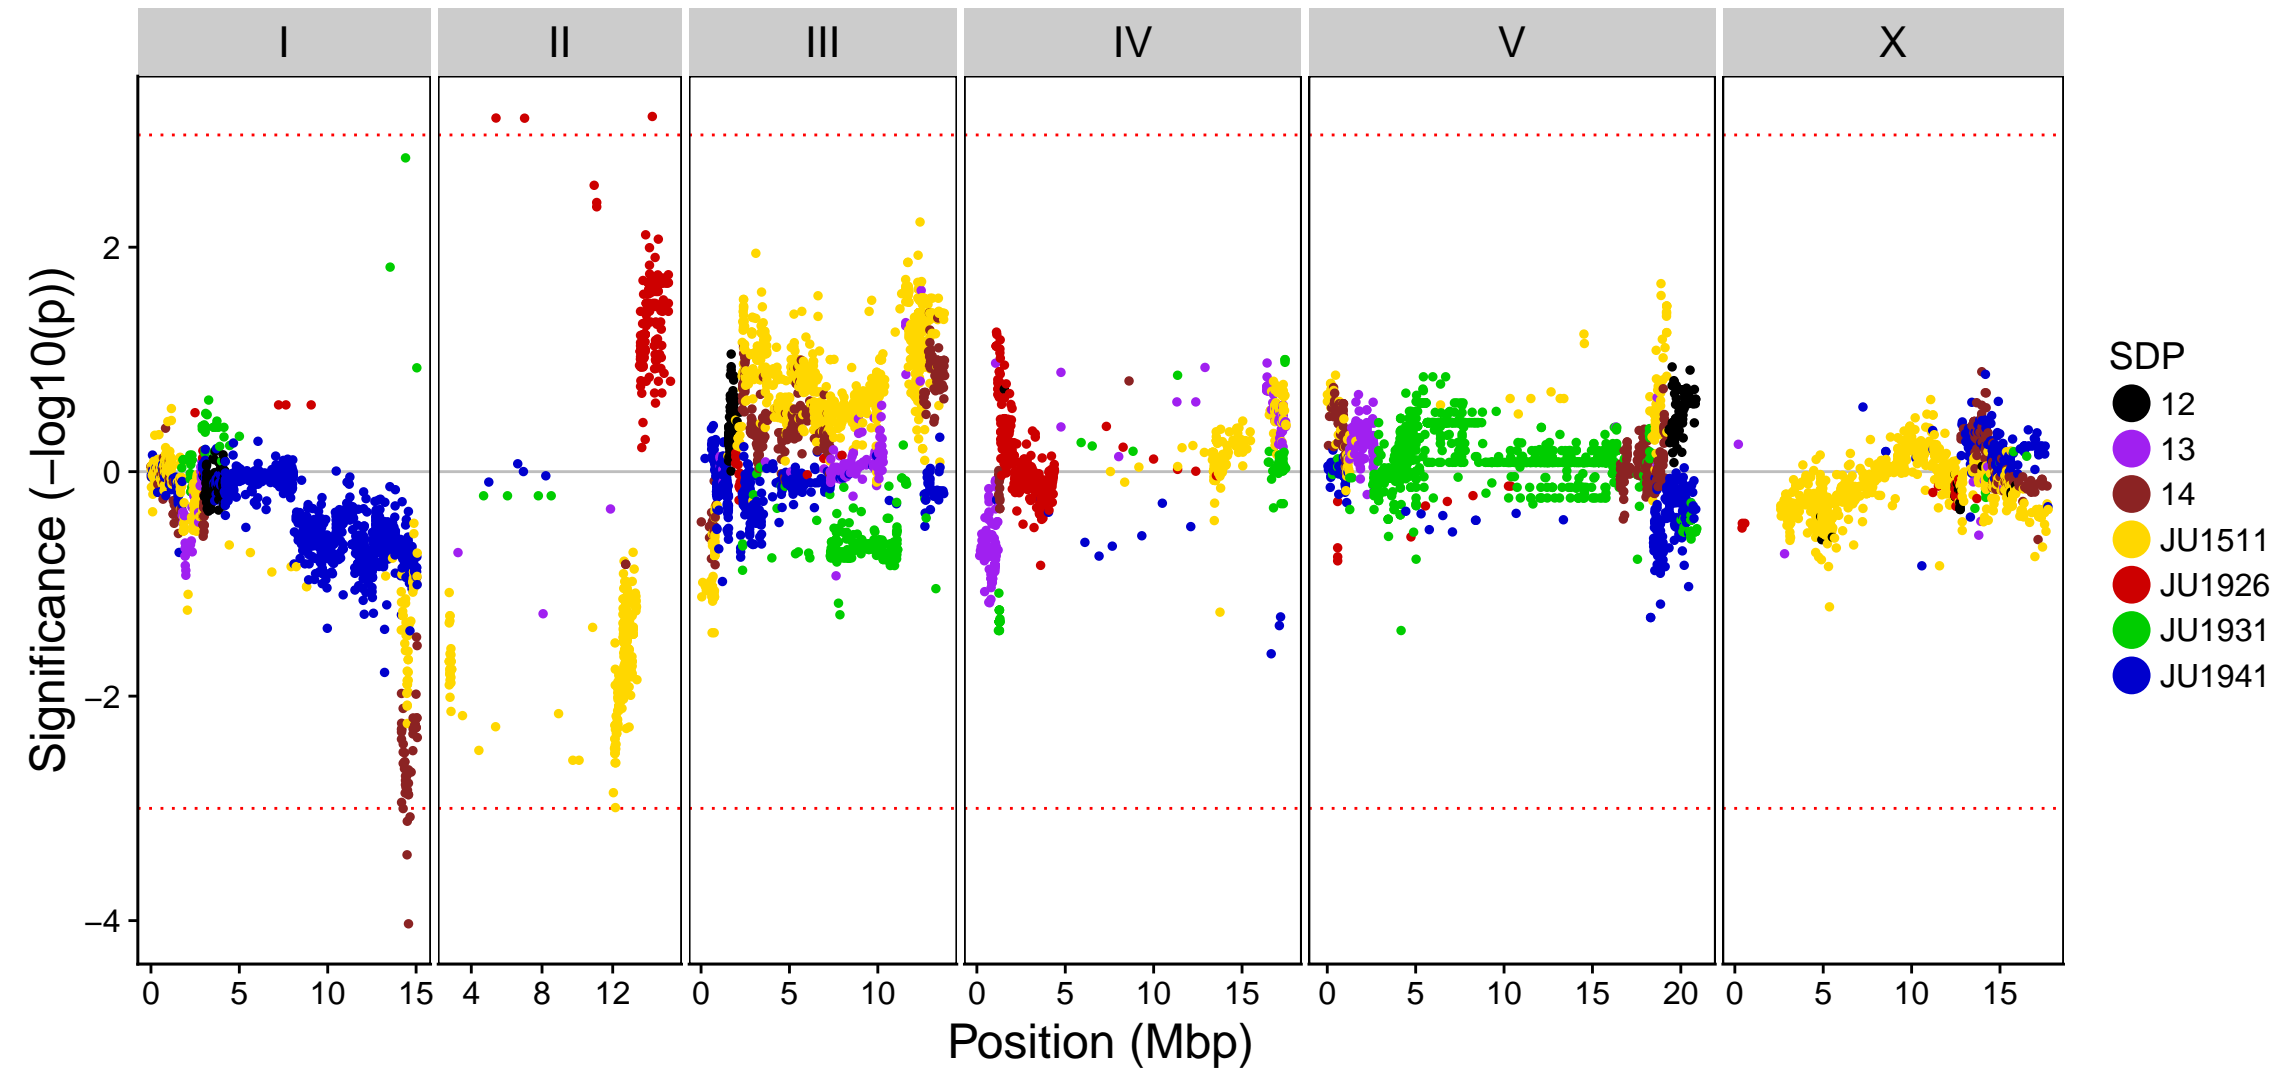

# Males Erwinia

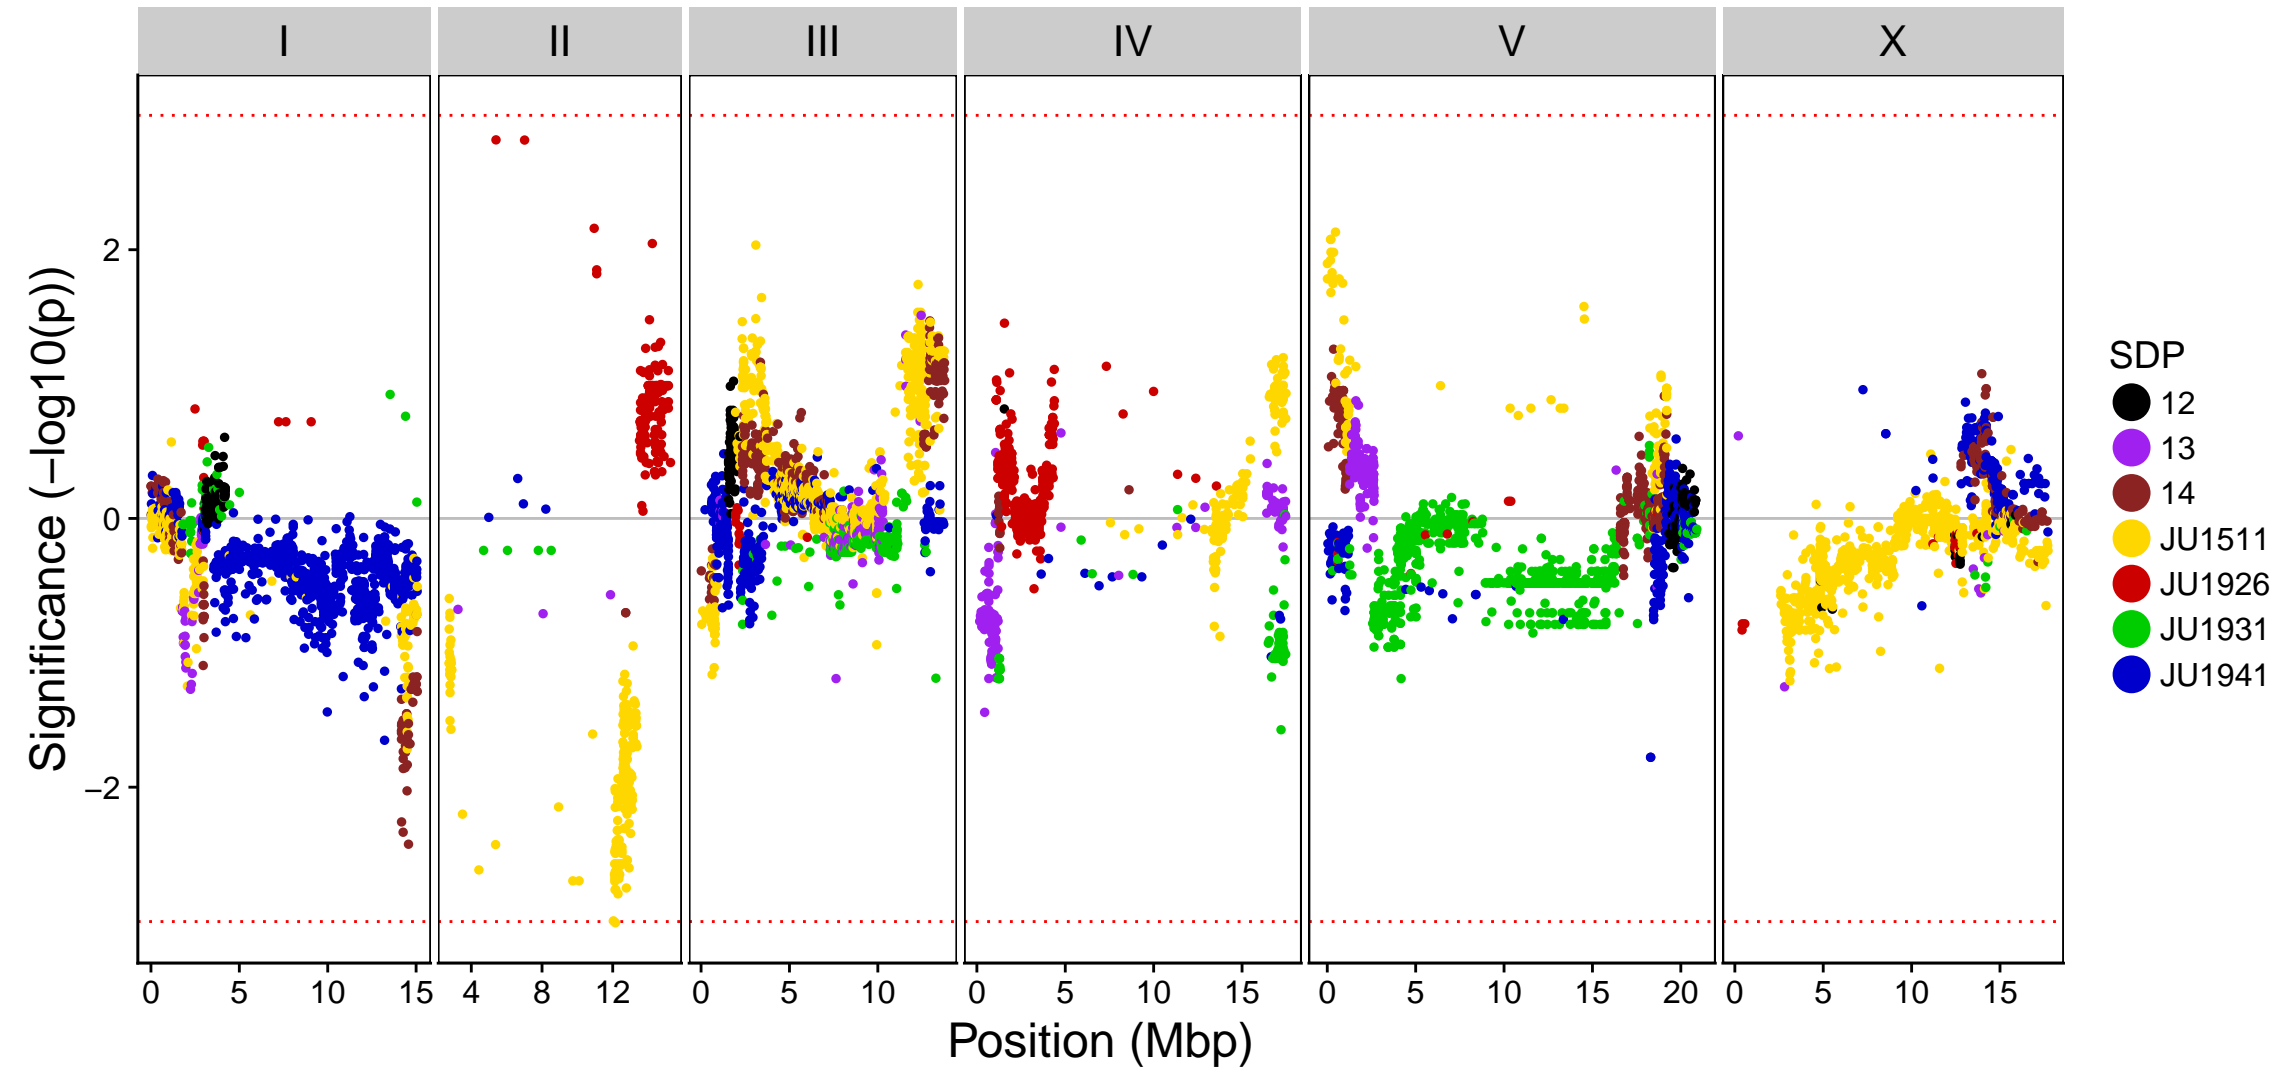

# First egg Erw (1)

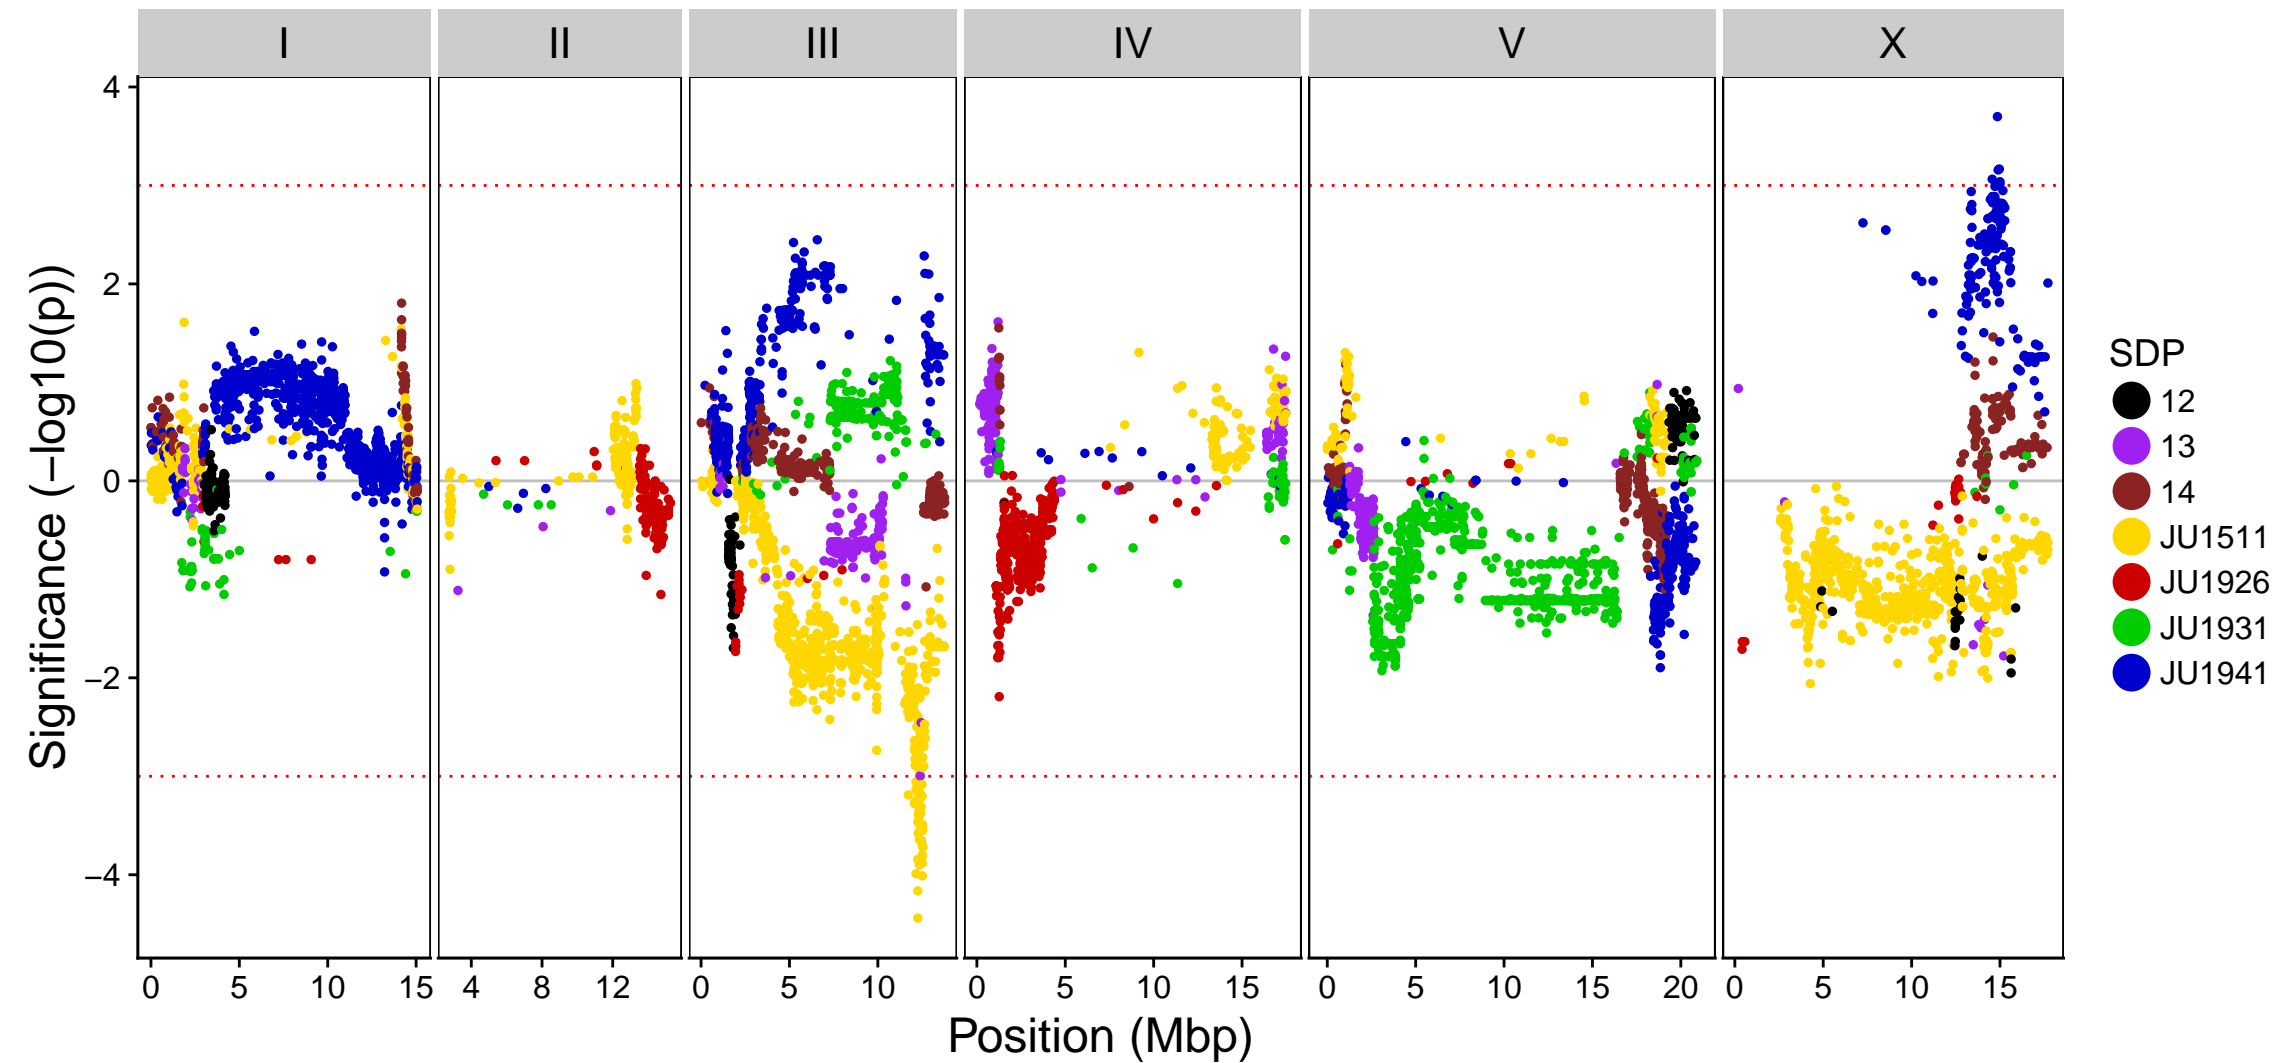



# First egg Erw (3)

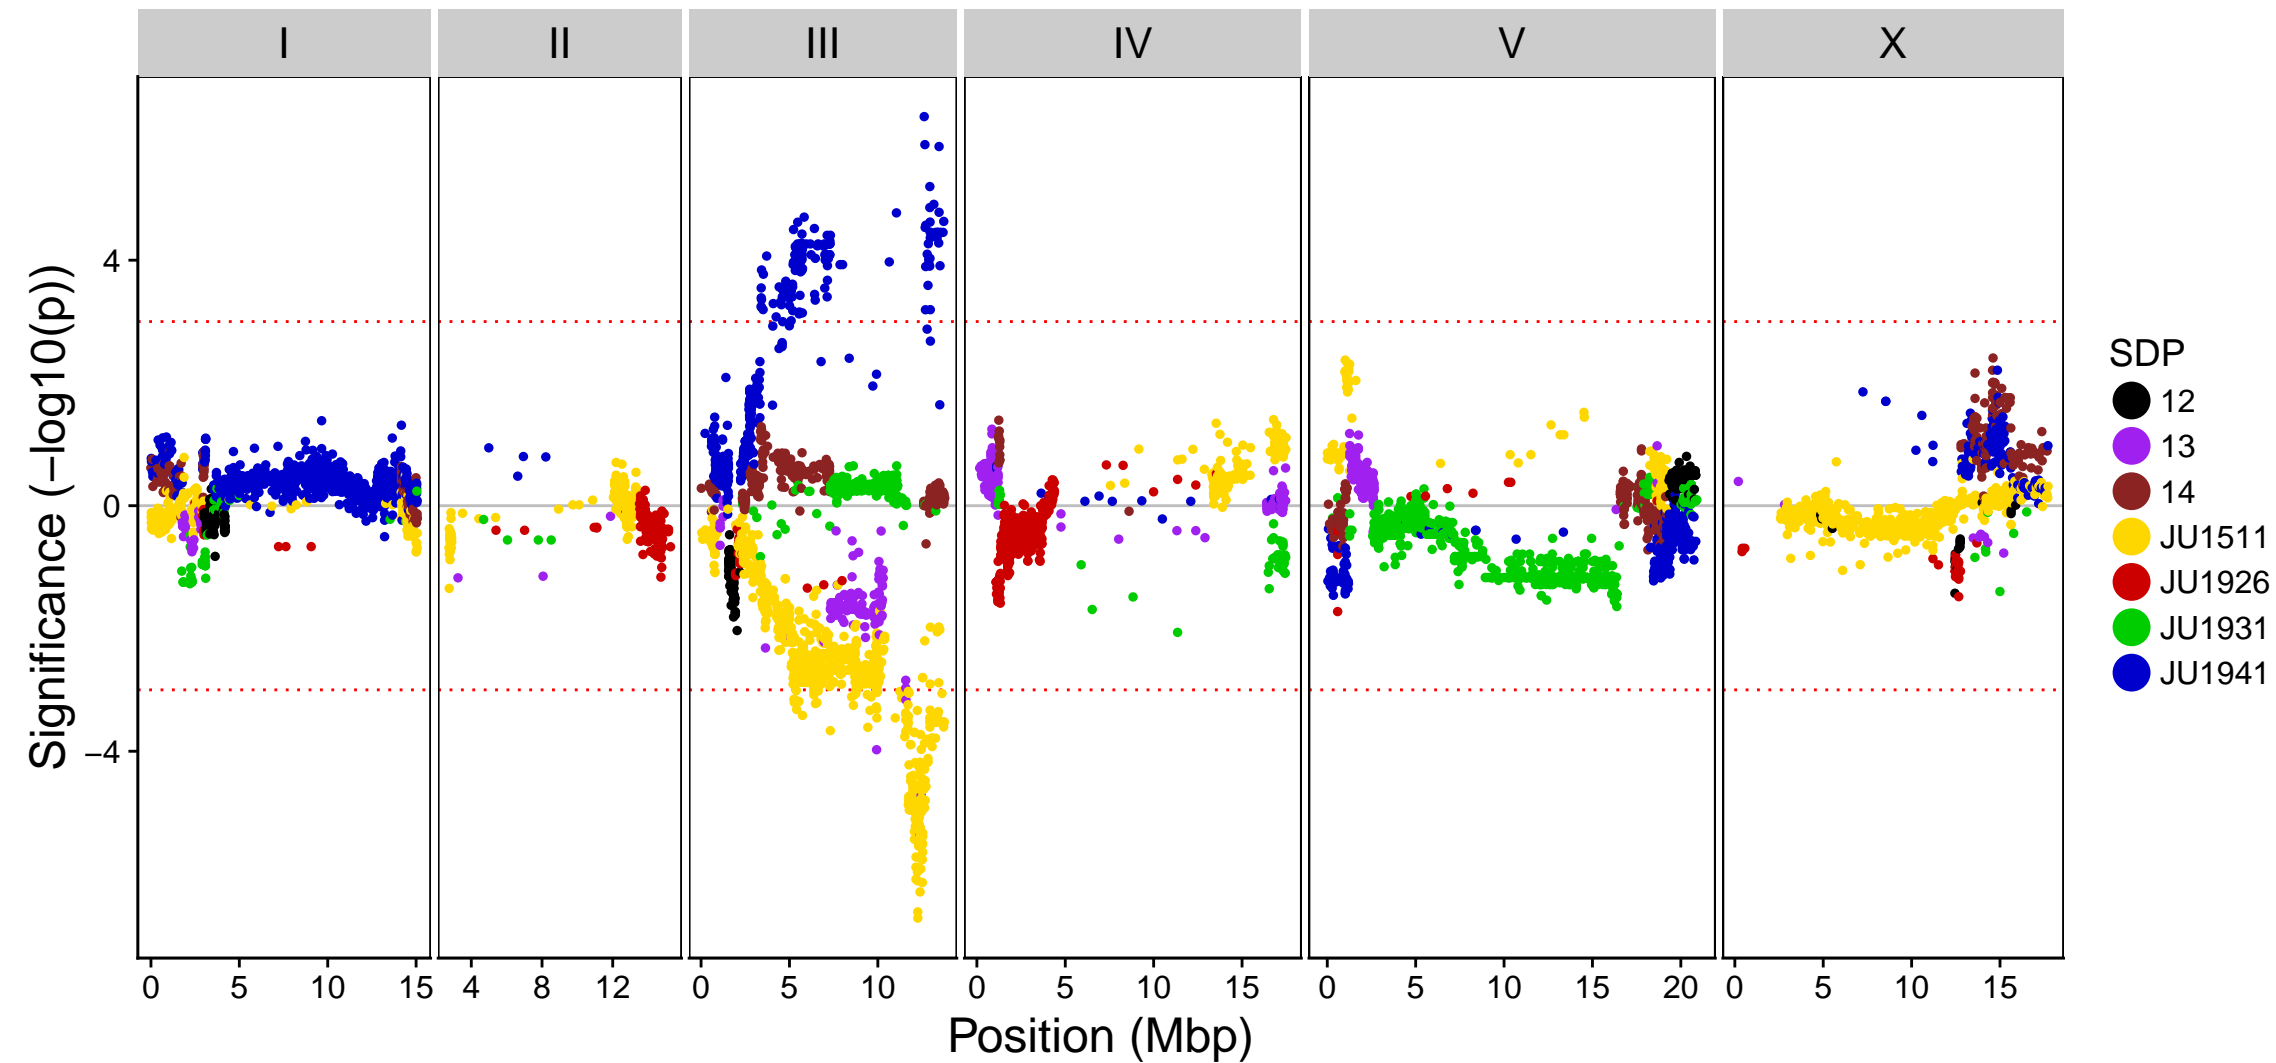

# First egg OP50 (1)

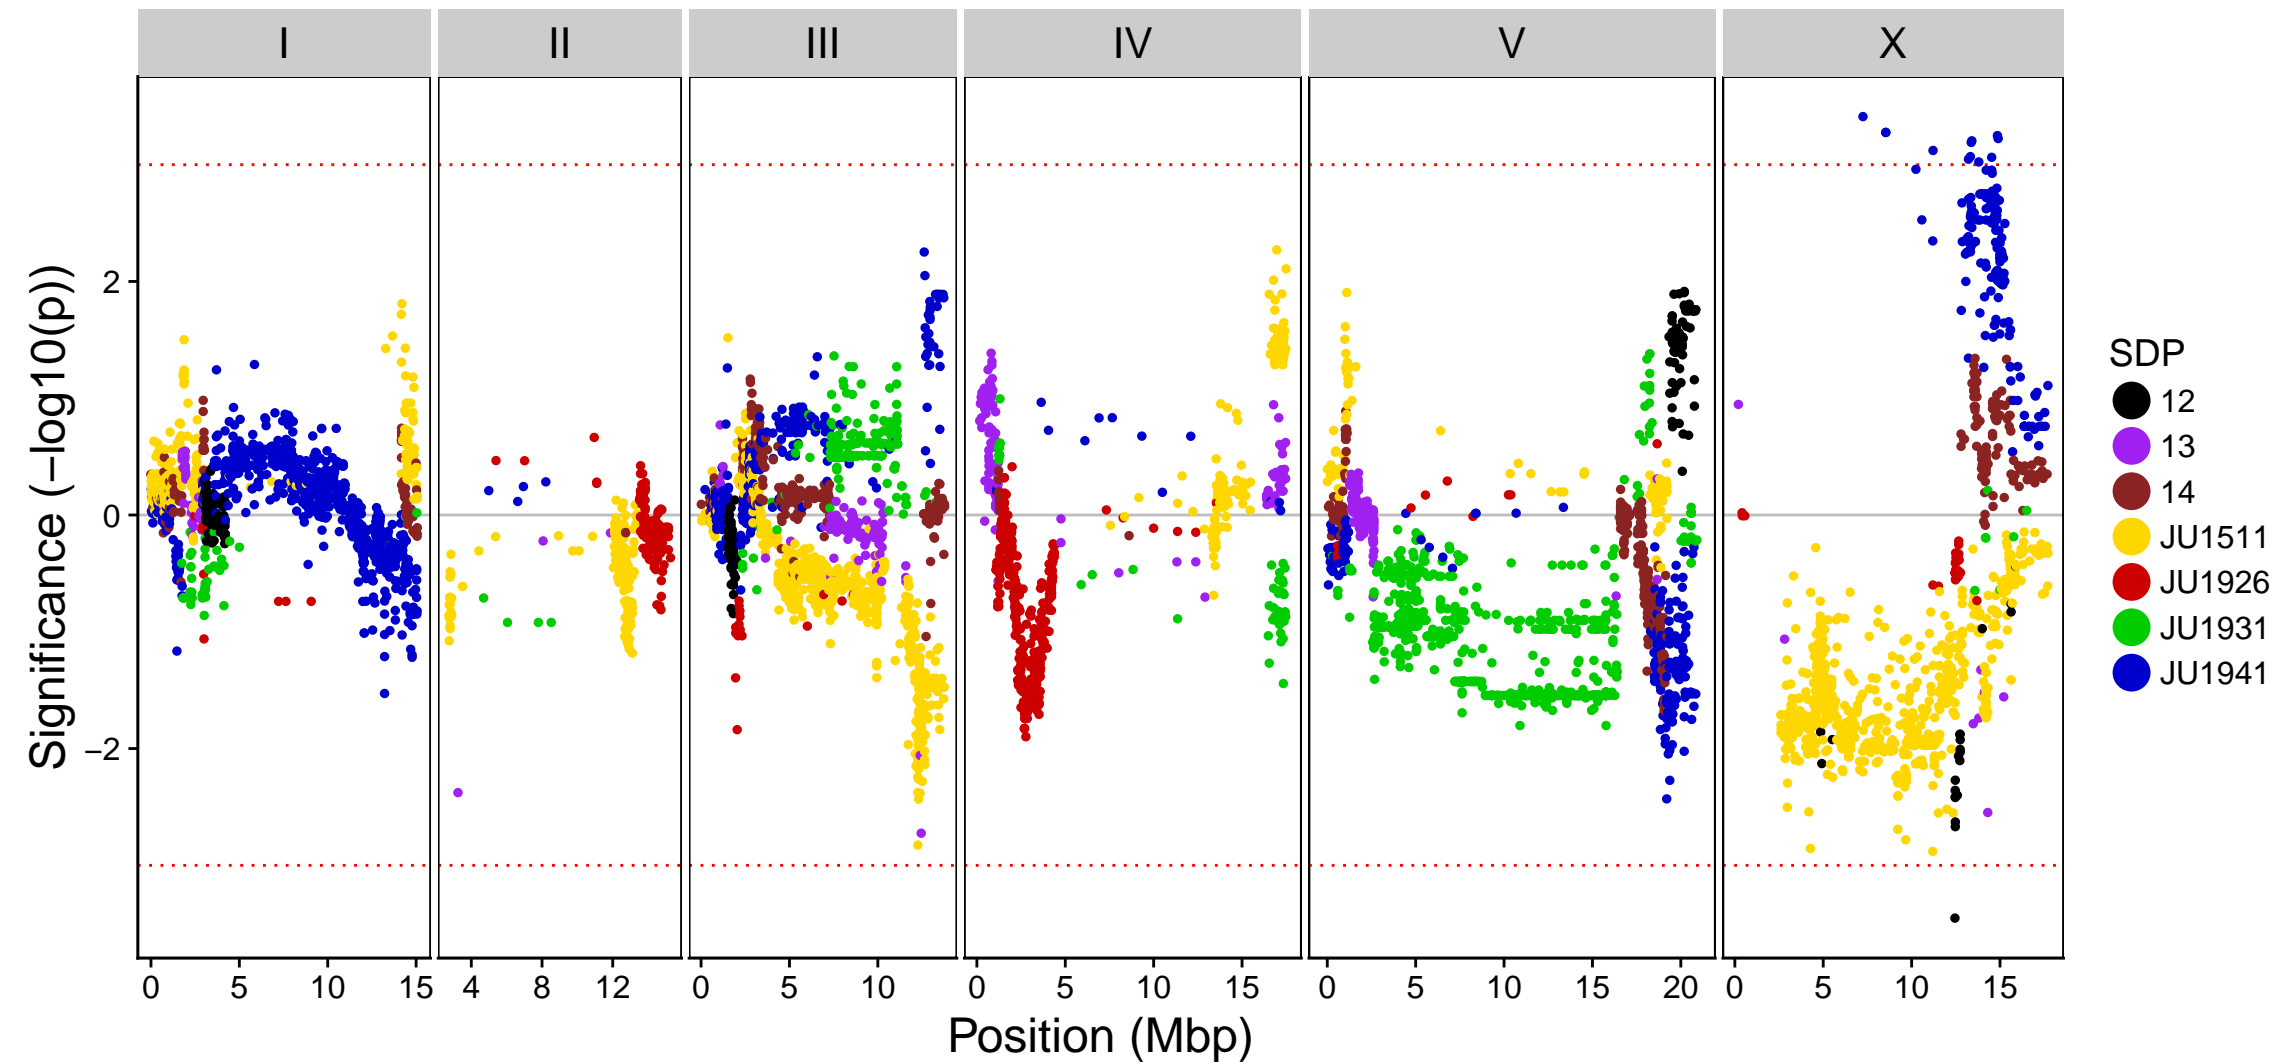

# First egg OP50 (3)

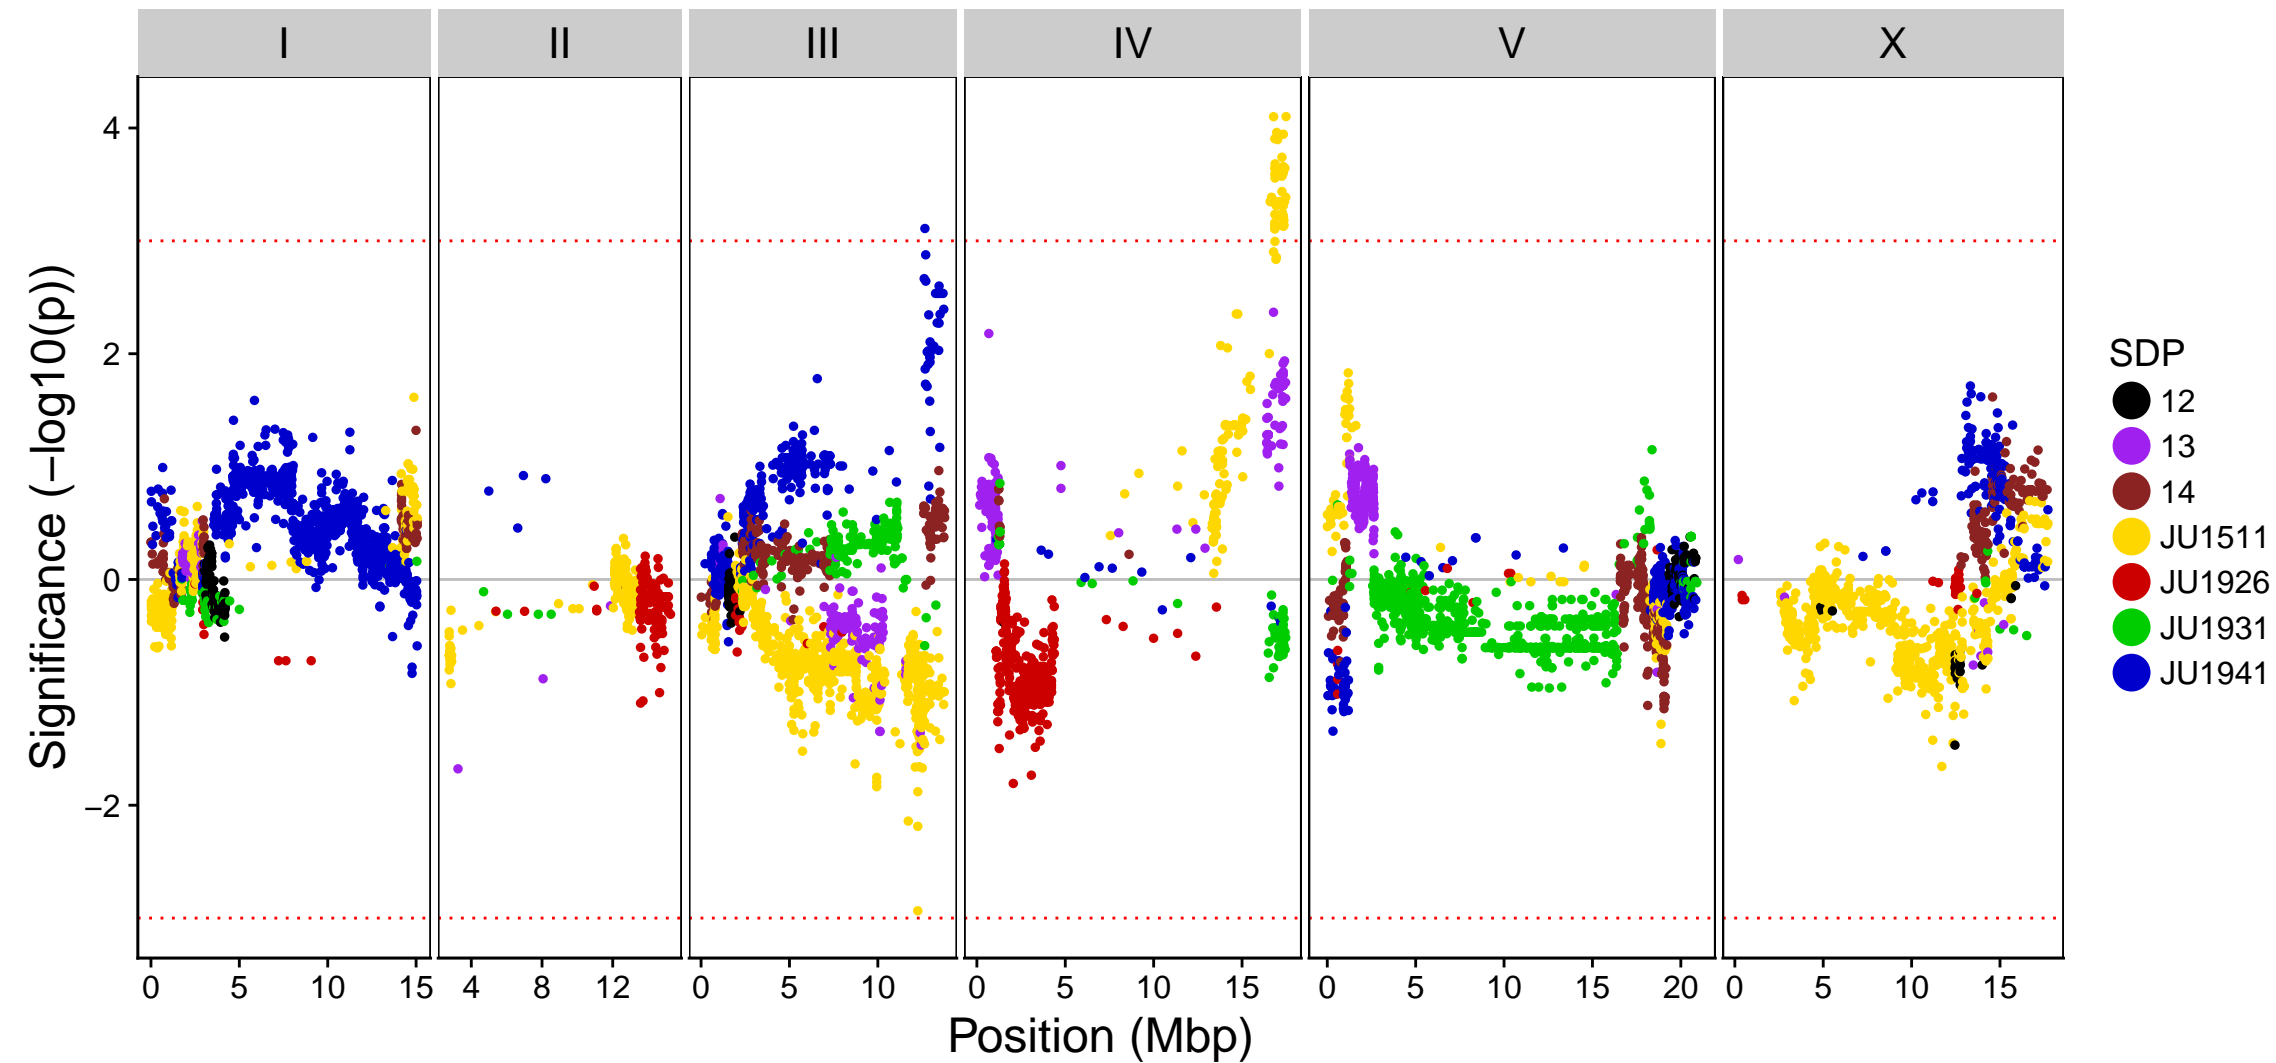

# Pop growth OP50

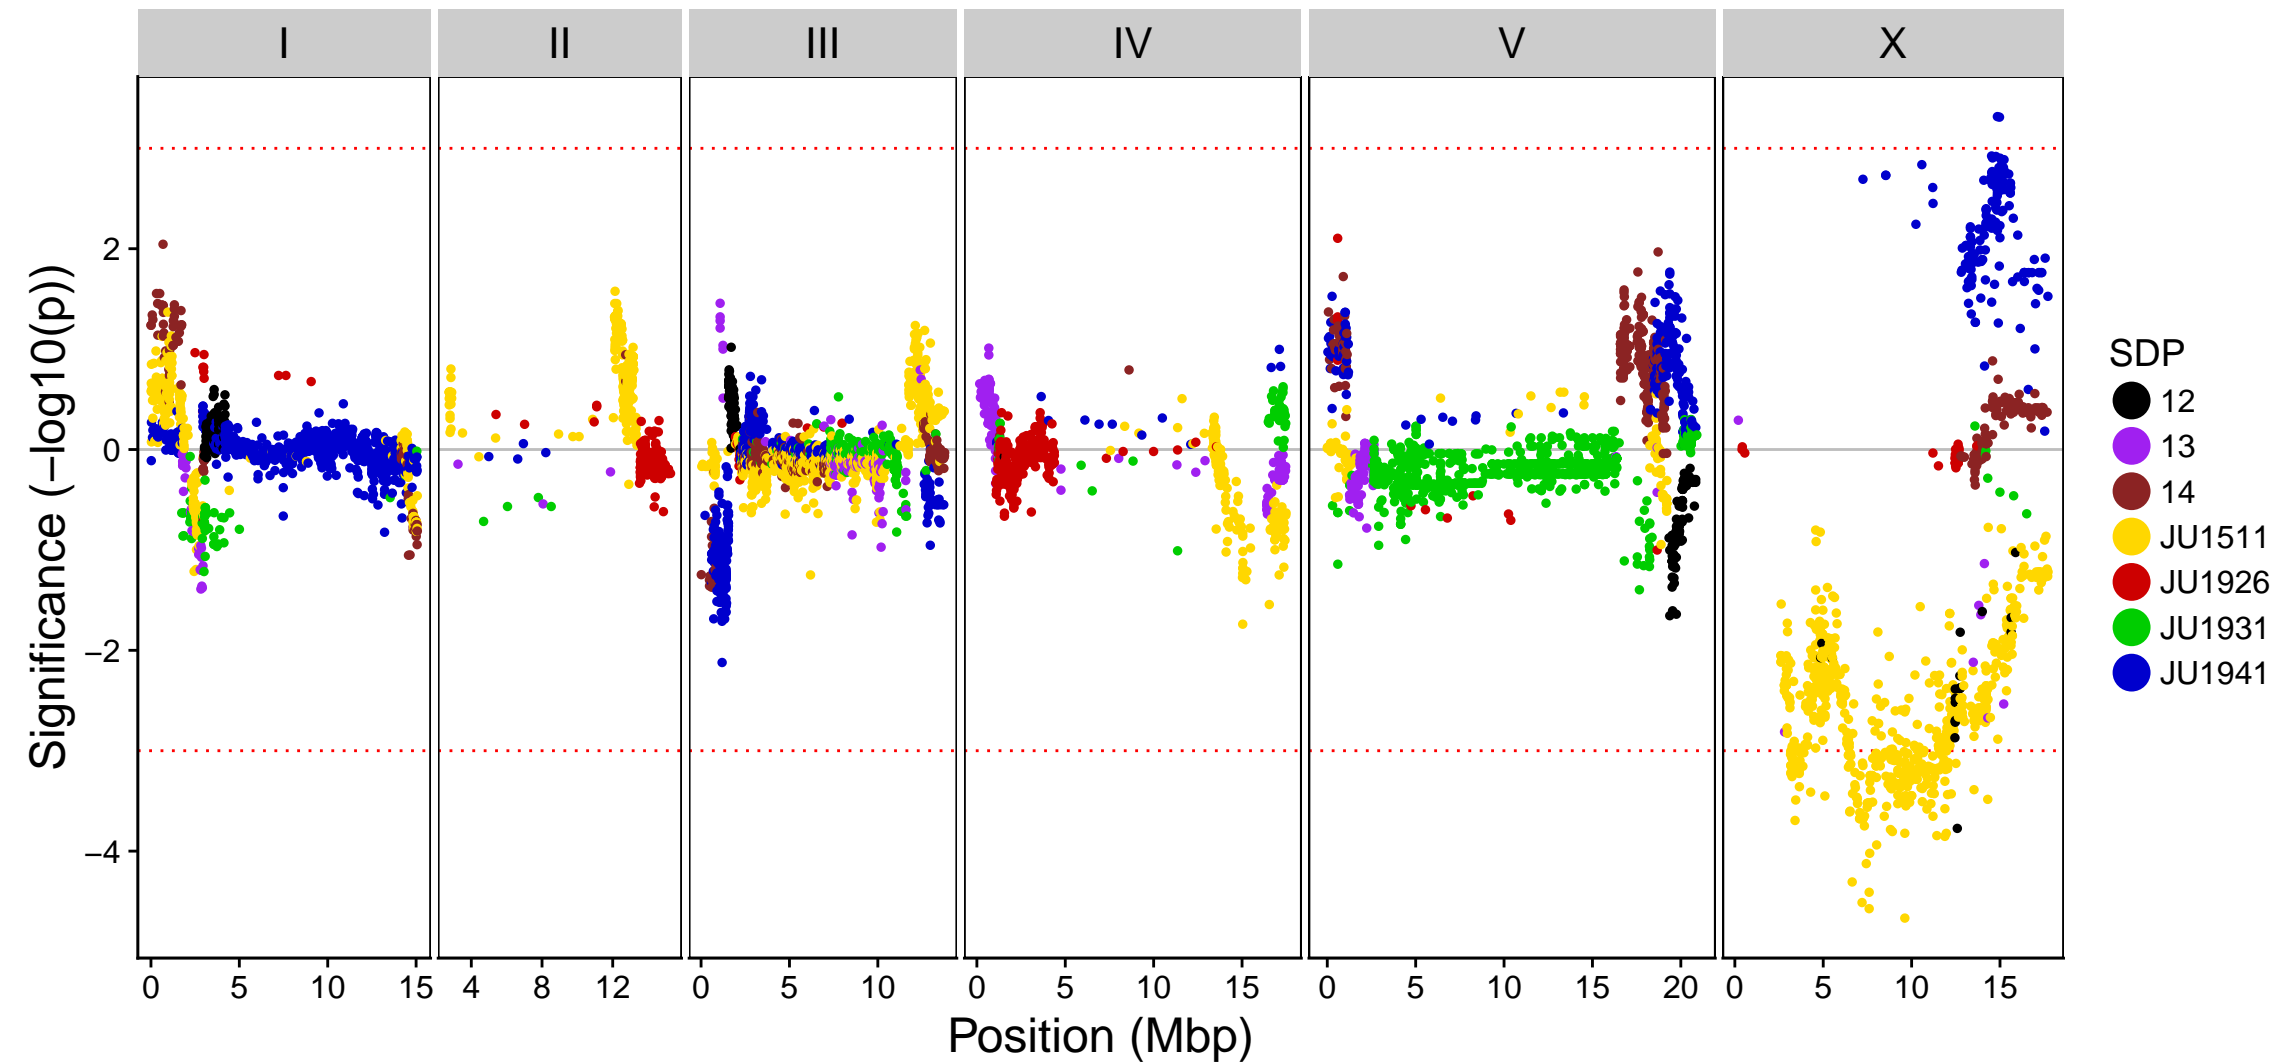

# Pop growth Erw

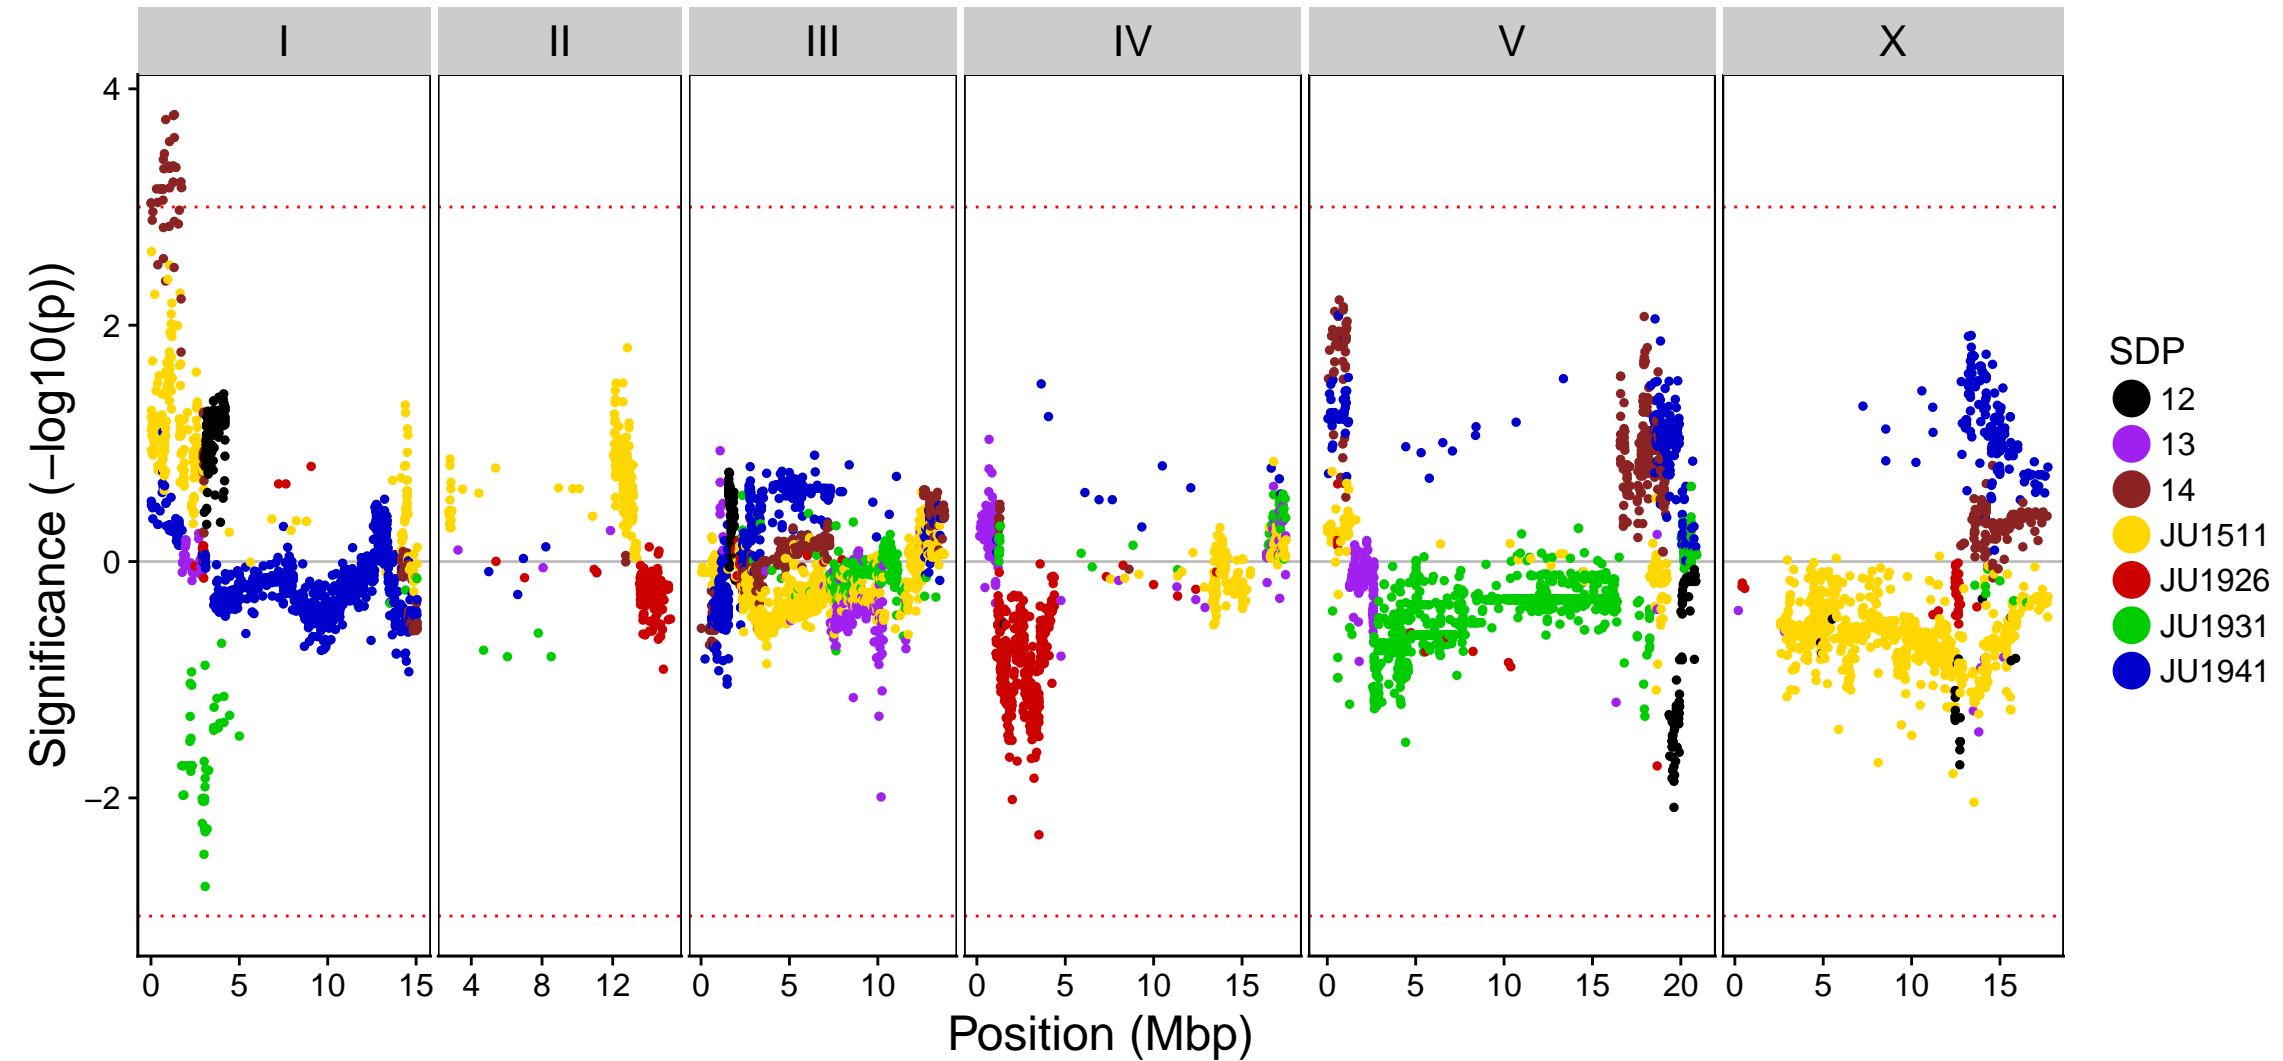

# Pop growth DSM

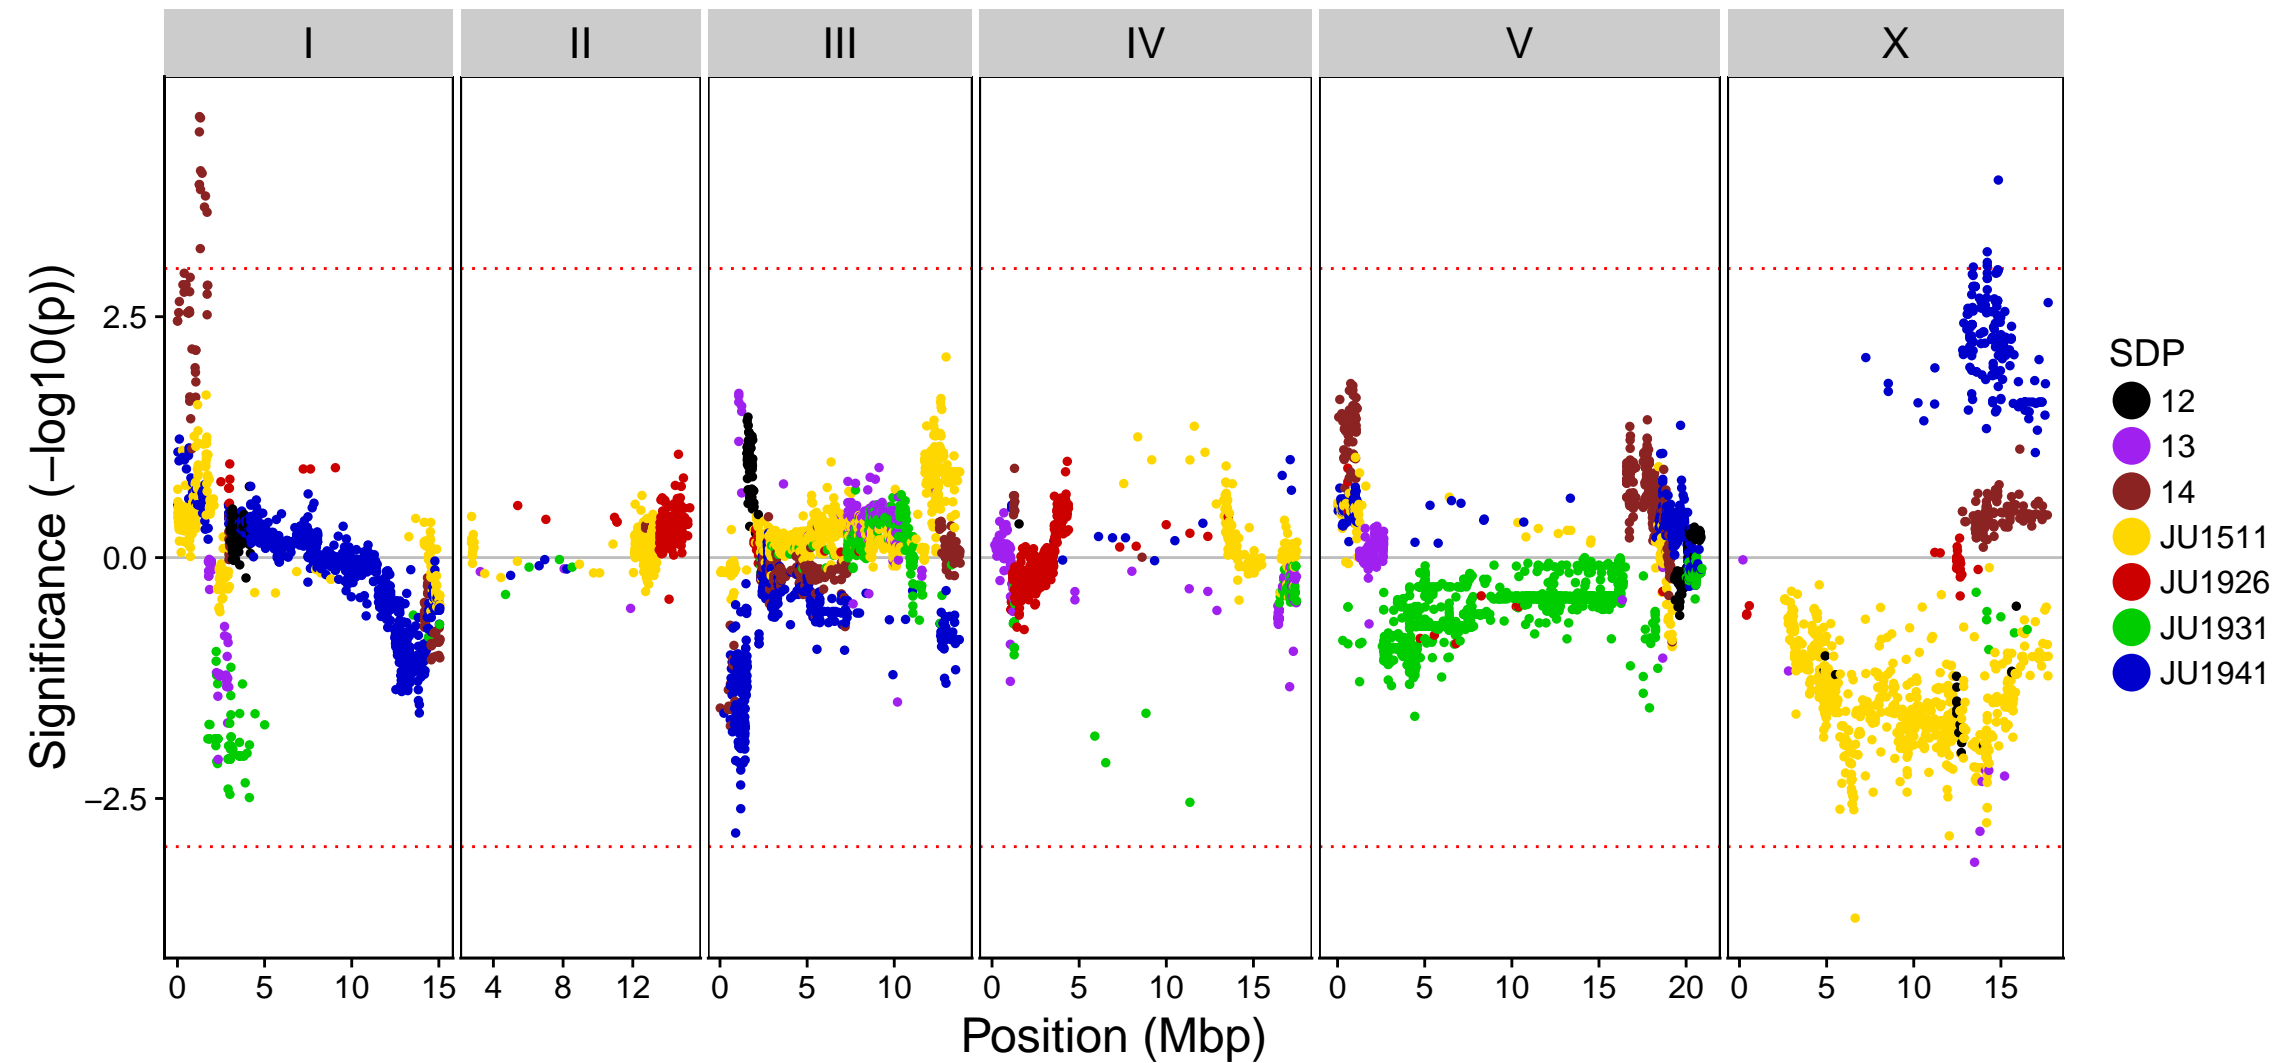

# Pop growth BT247

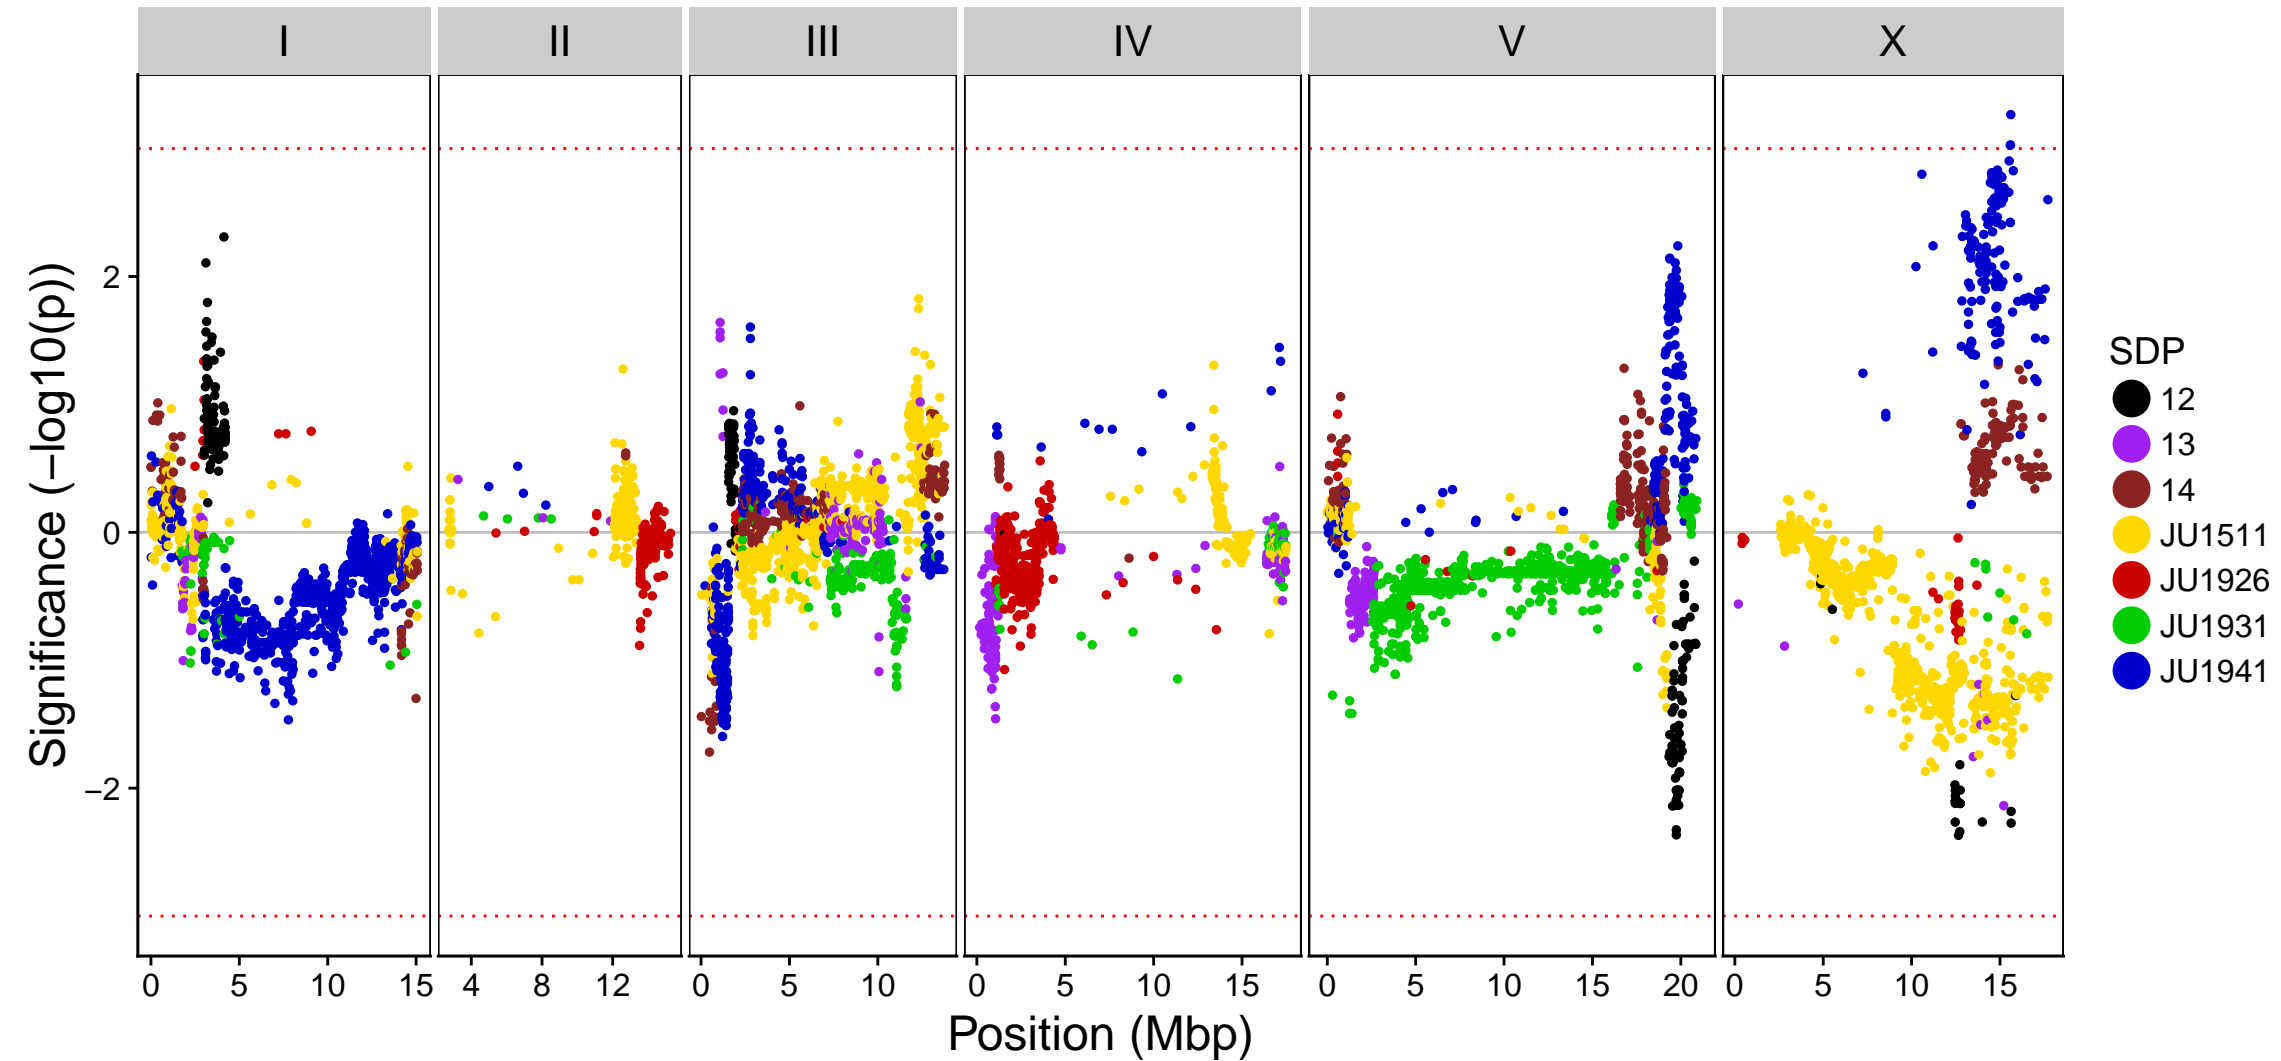

# Pop growth BT247D

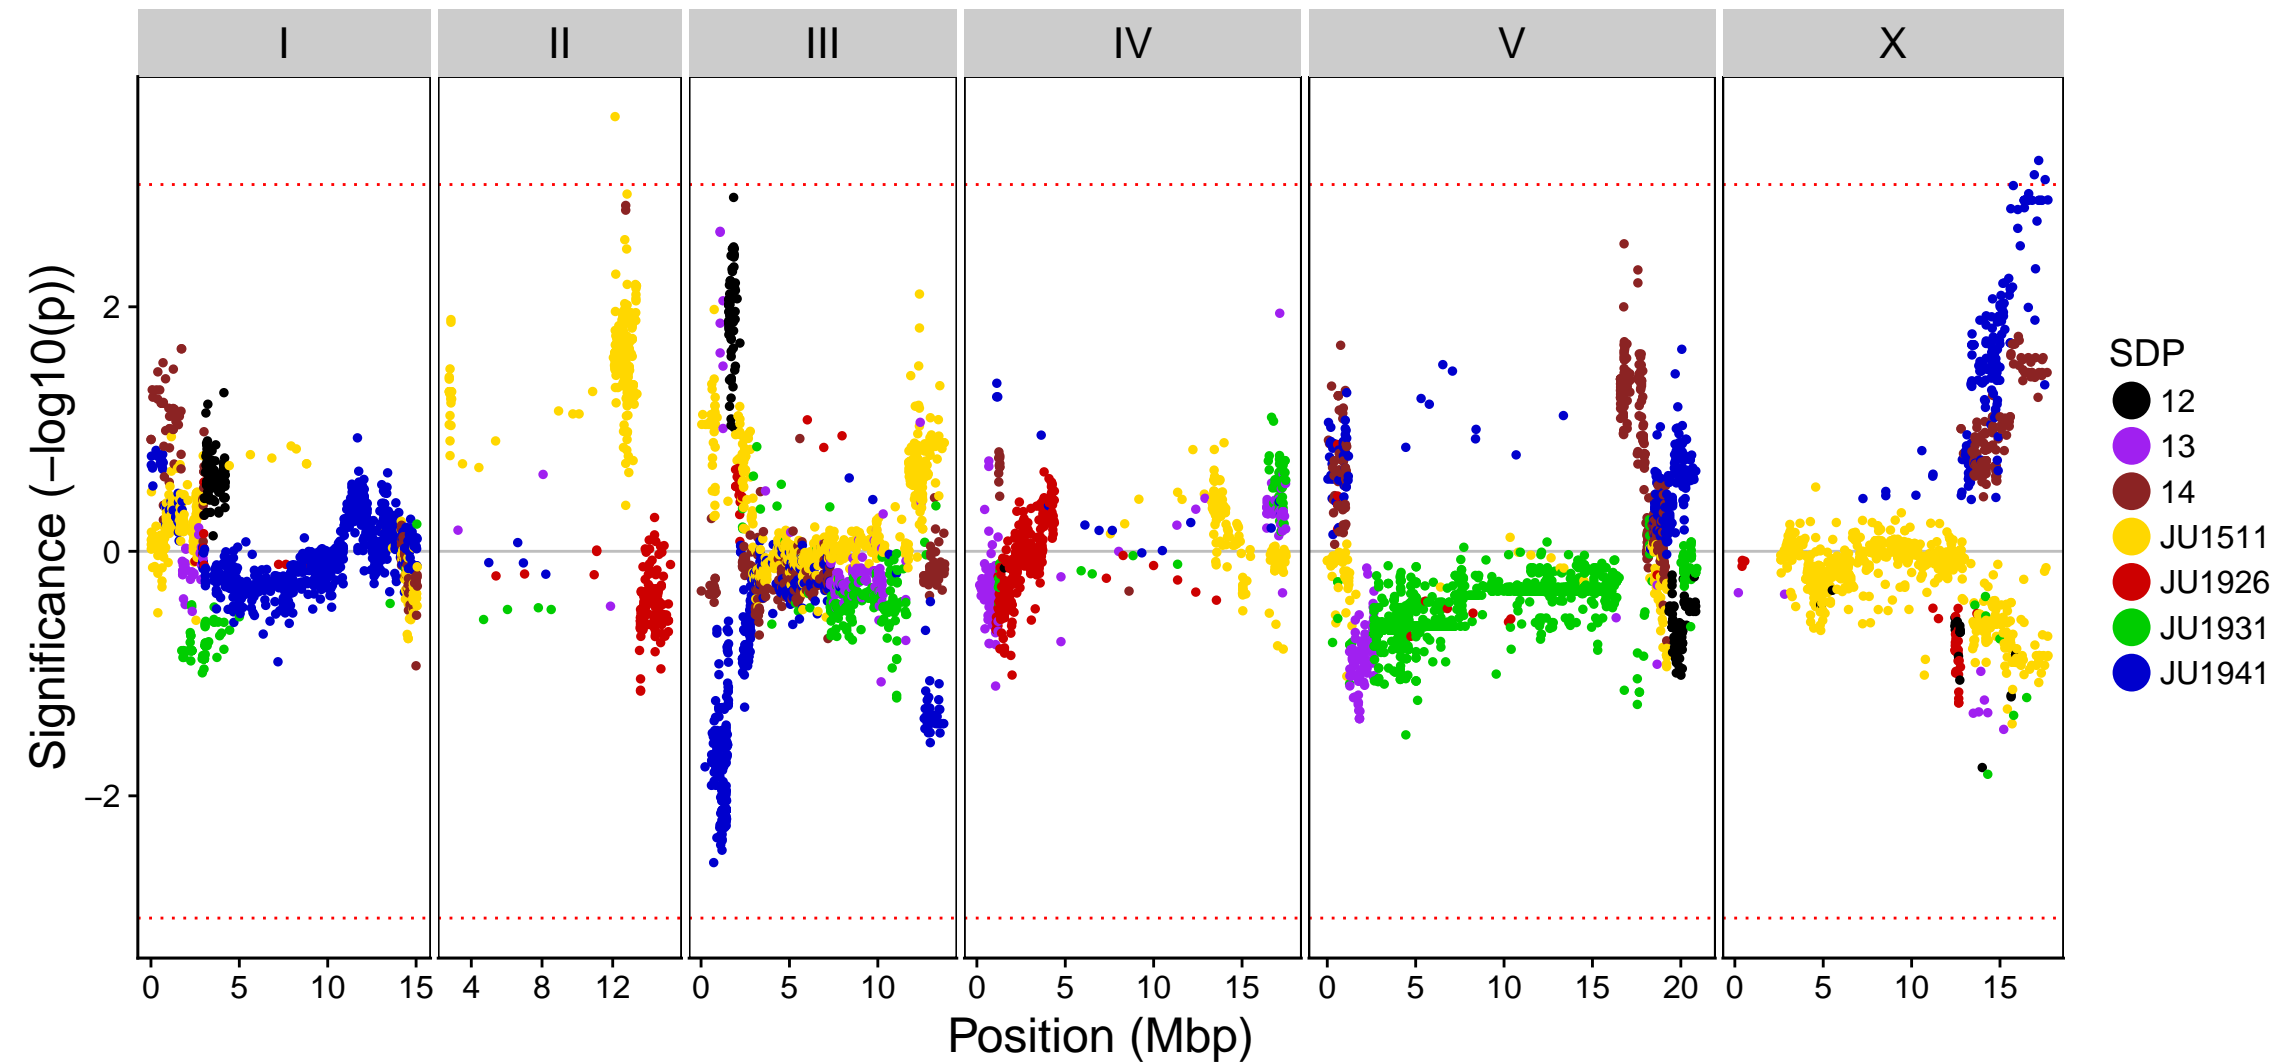



# Pop growth Spingo

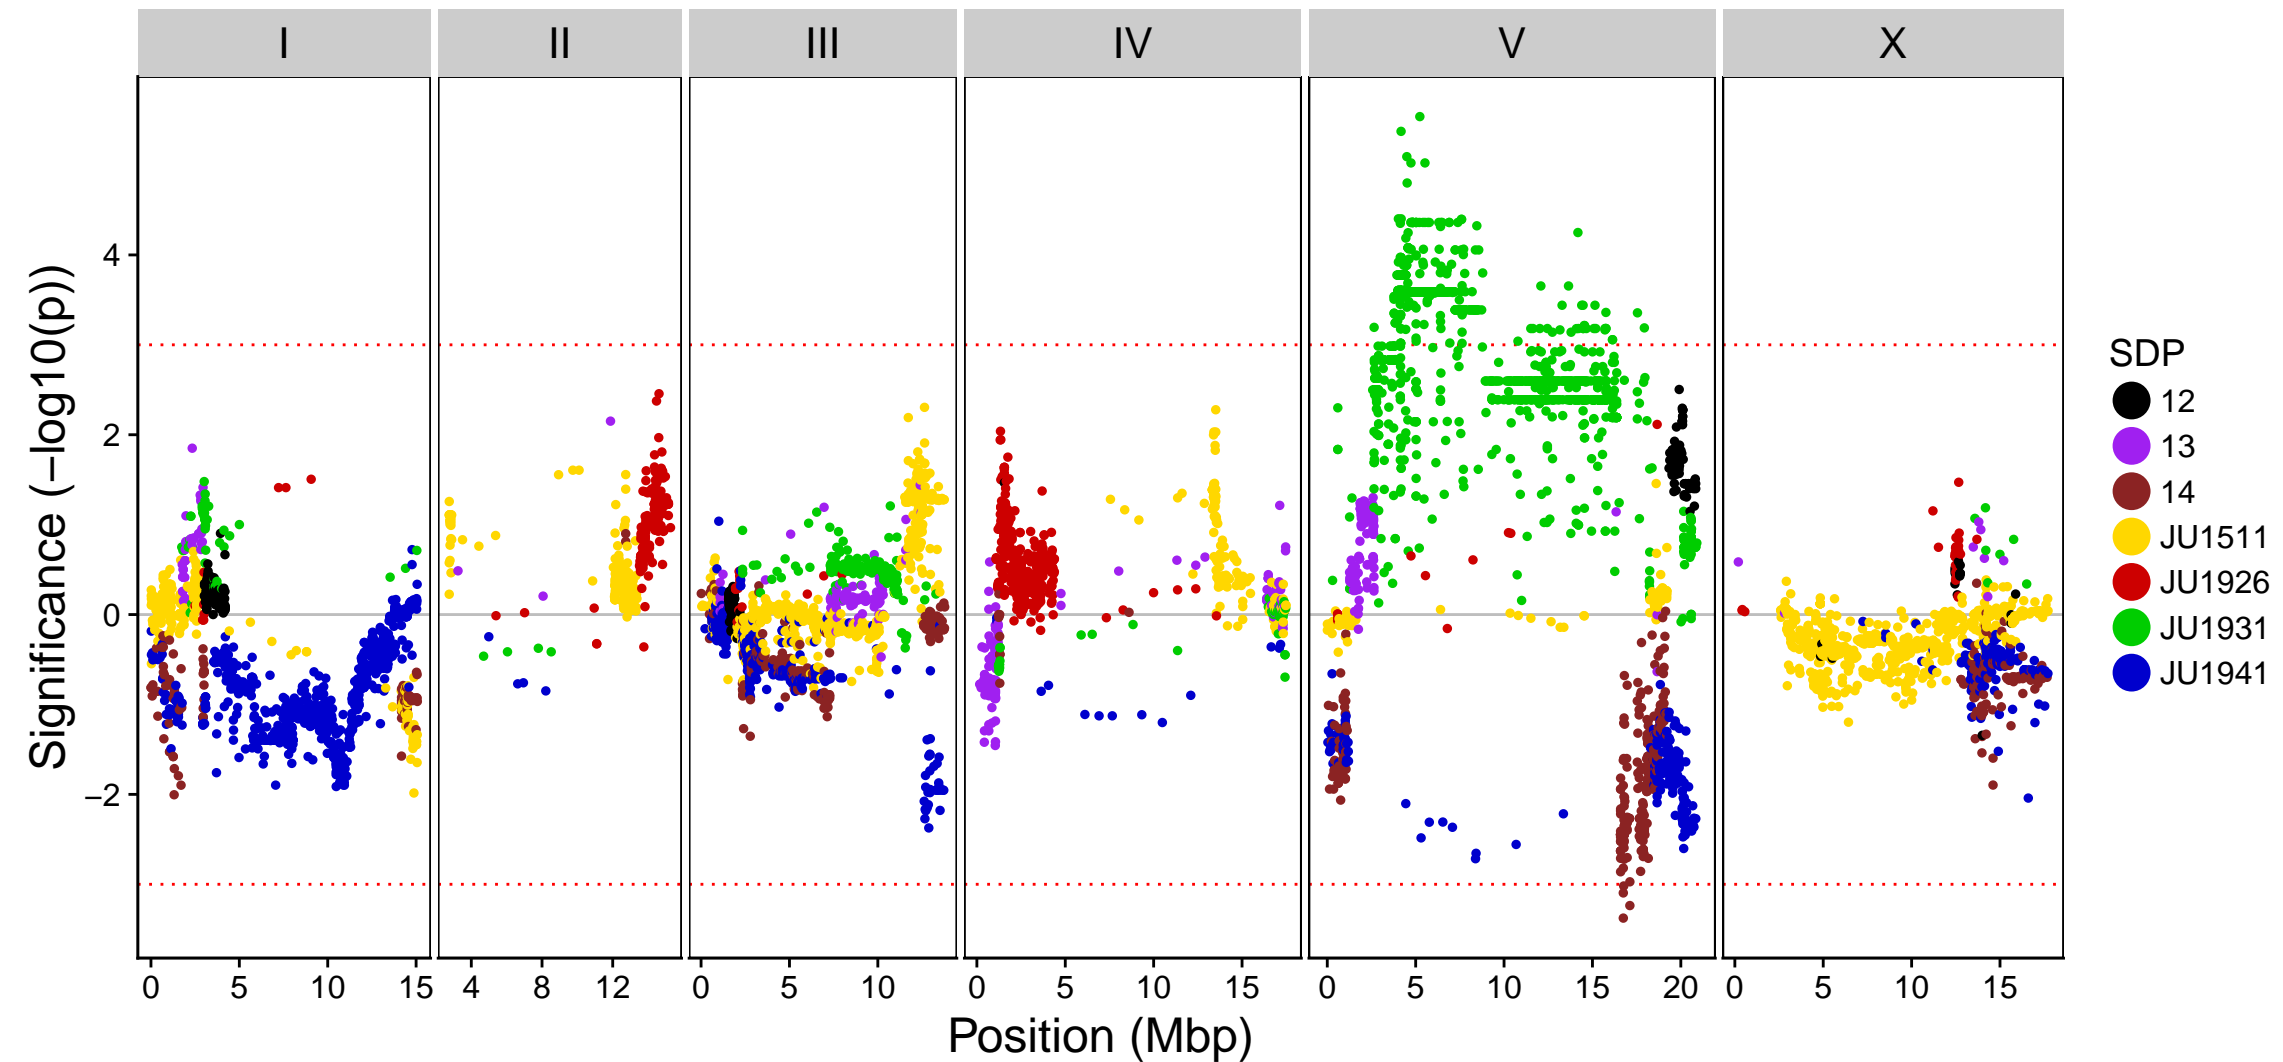

Supplement: 12915_2019_642_MOESM5_ESM.pdf [file 12915_2019_642_MOESM5_ESM.pdf]
