# Supplementary material for: A multi-parent recombinant inbred line population of C. elegans allows identification of novel QTLs for complex life history traits
Source: PubMed Central journal article supplement (PMC6417139; doi:10.1186/s12915-019-0642-8), 2019-03-12

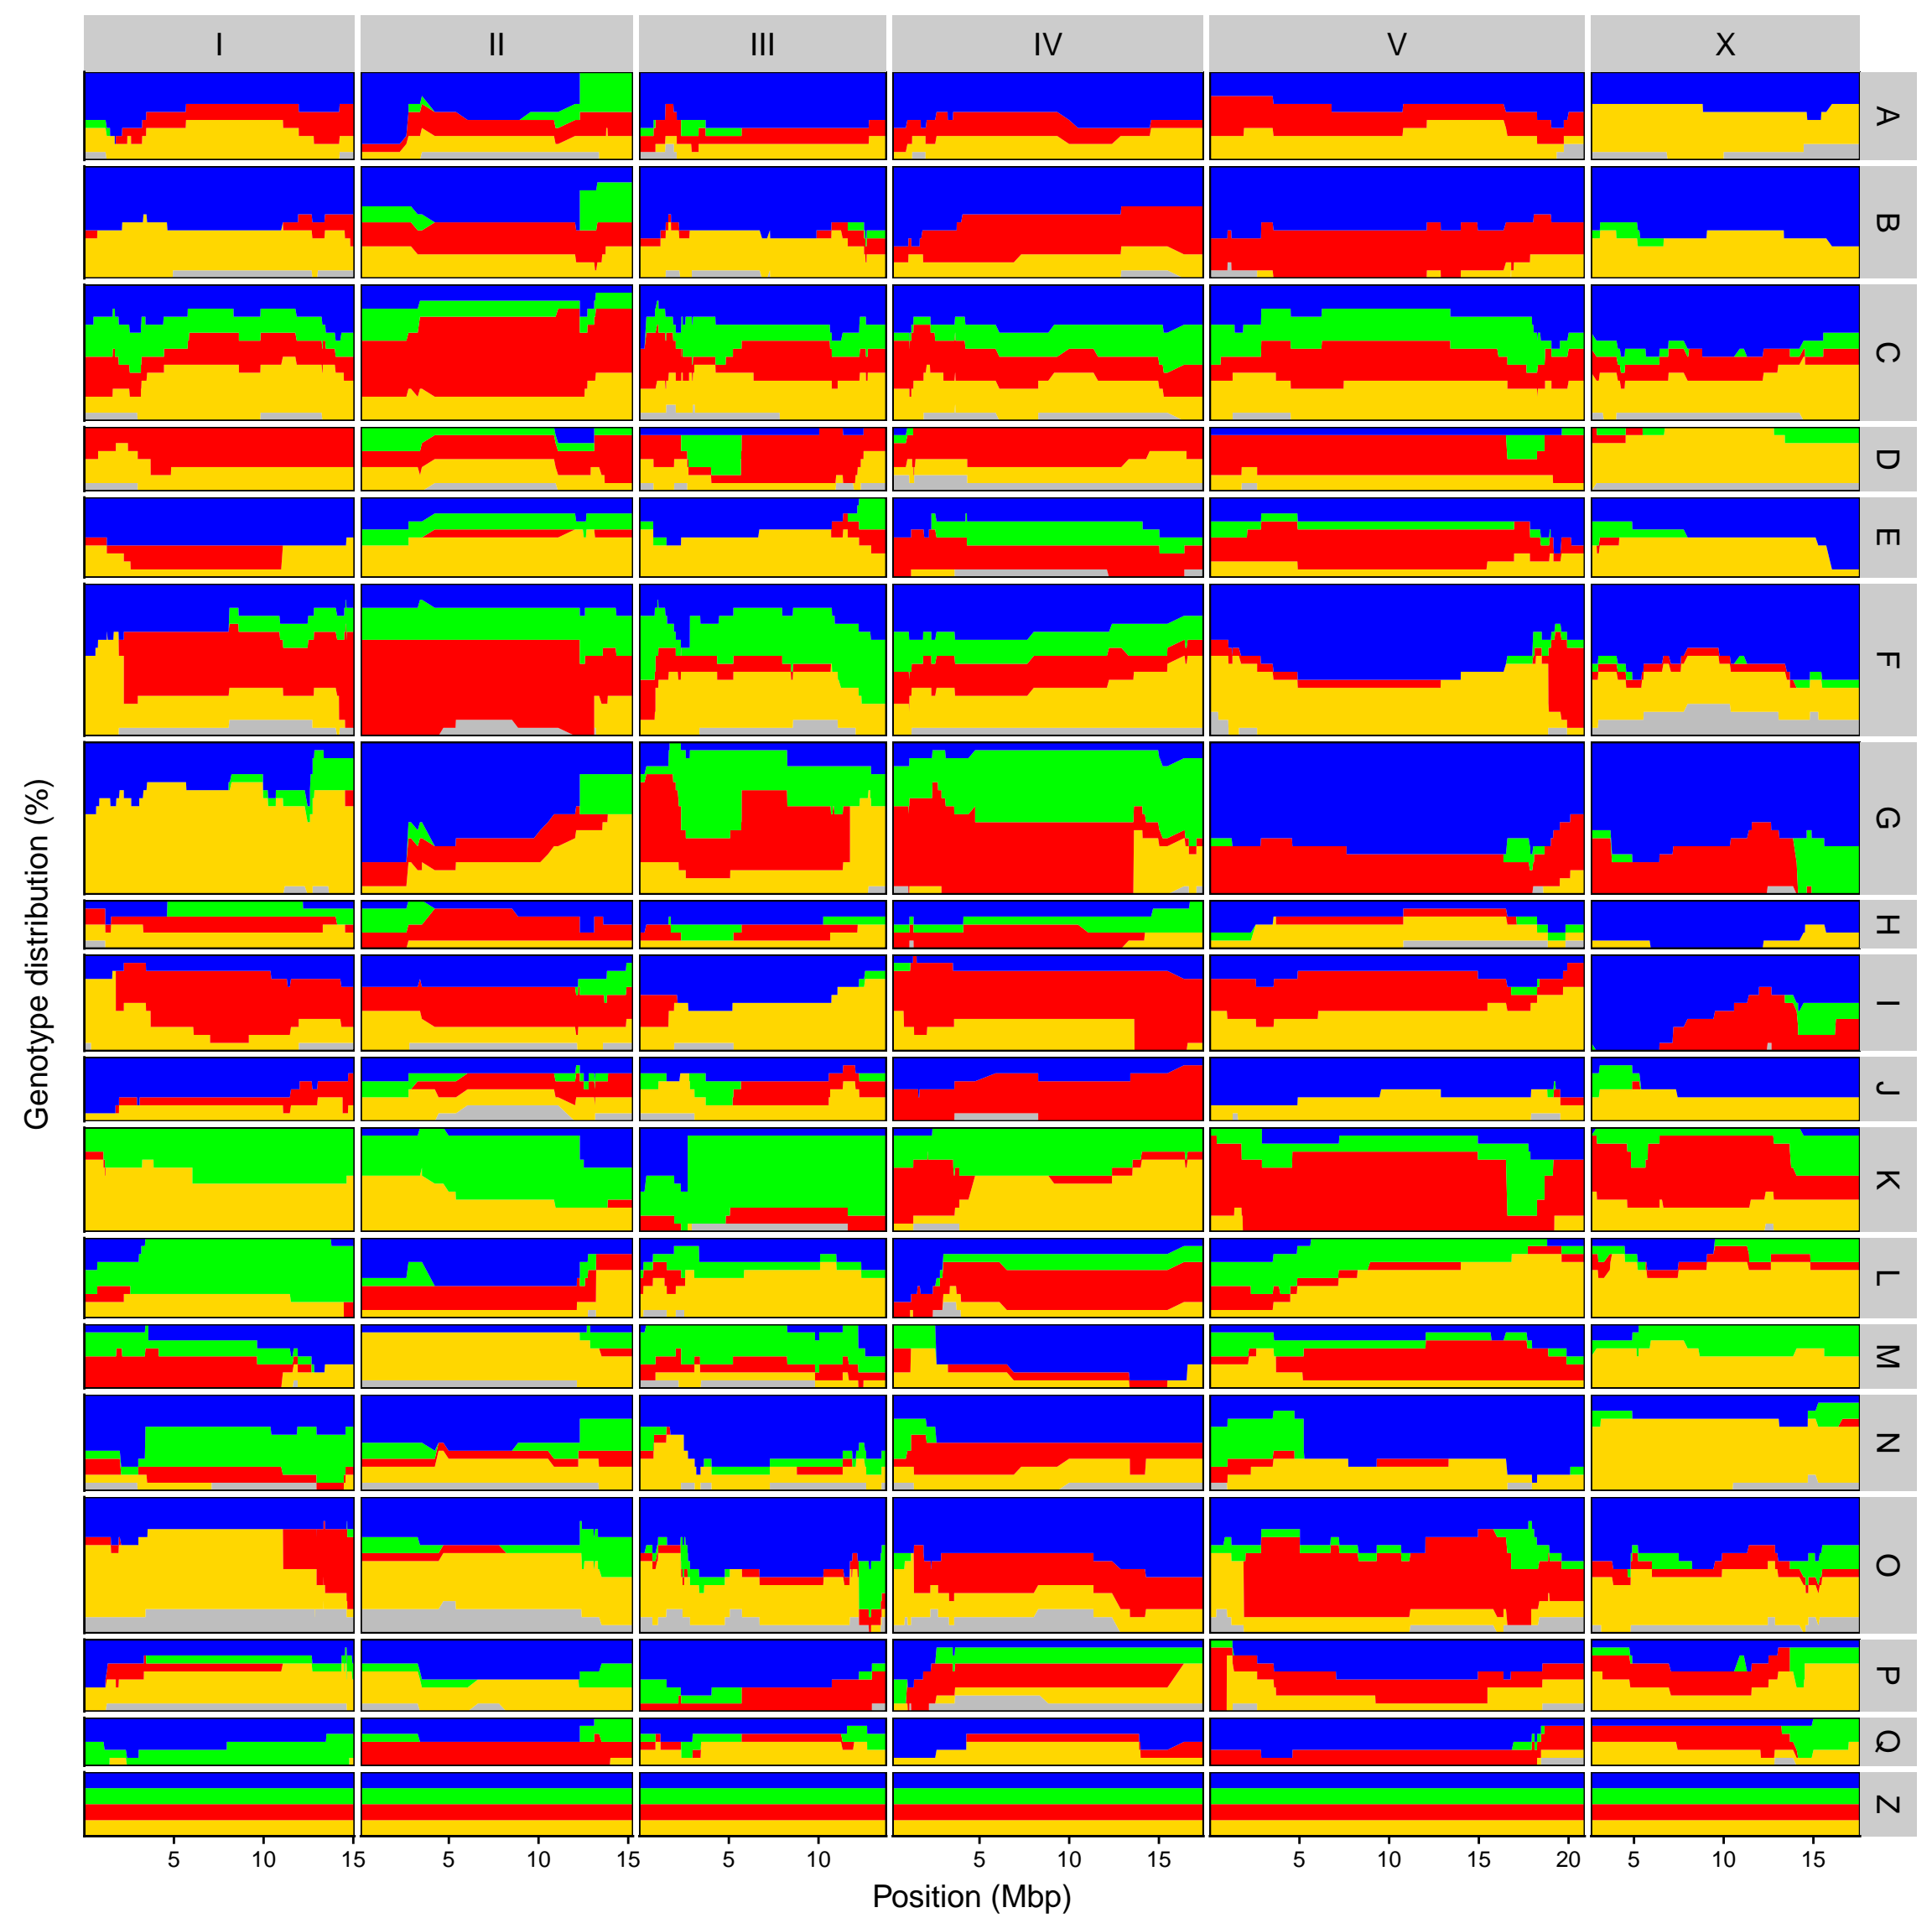

Supplement: 12915_2019_642_MOESM2_ESM.pdf [file 12915_2019_642_MOESM2_ESM.pdf]
